# Supplementary material for: Autozygosity islands and ROH patterns in Nellore lineages: evidence of selection for functionally important traits
Source: PubMed Central journal article supplement (PMC6142381; doi:10.1186/s12864-018-5060-8), 2018-09-17

**BTA1**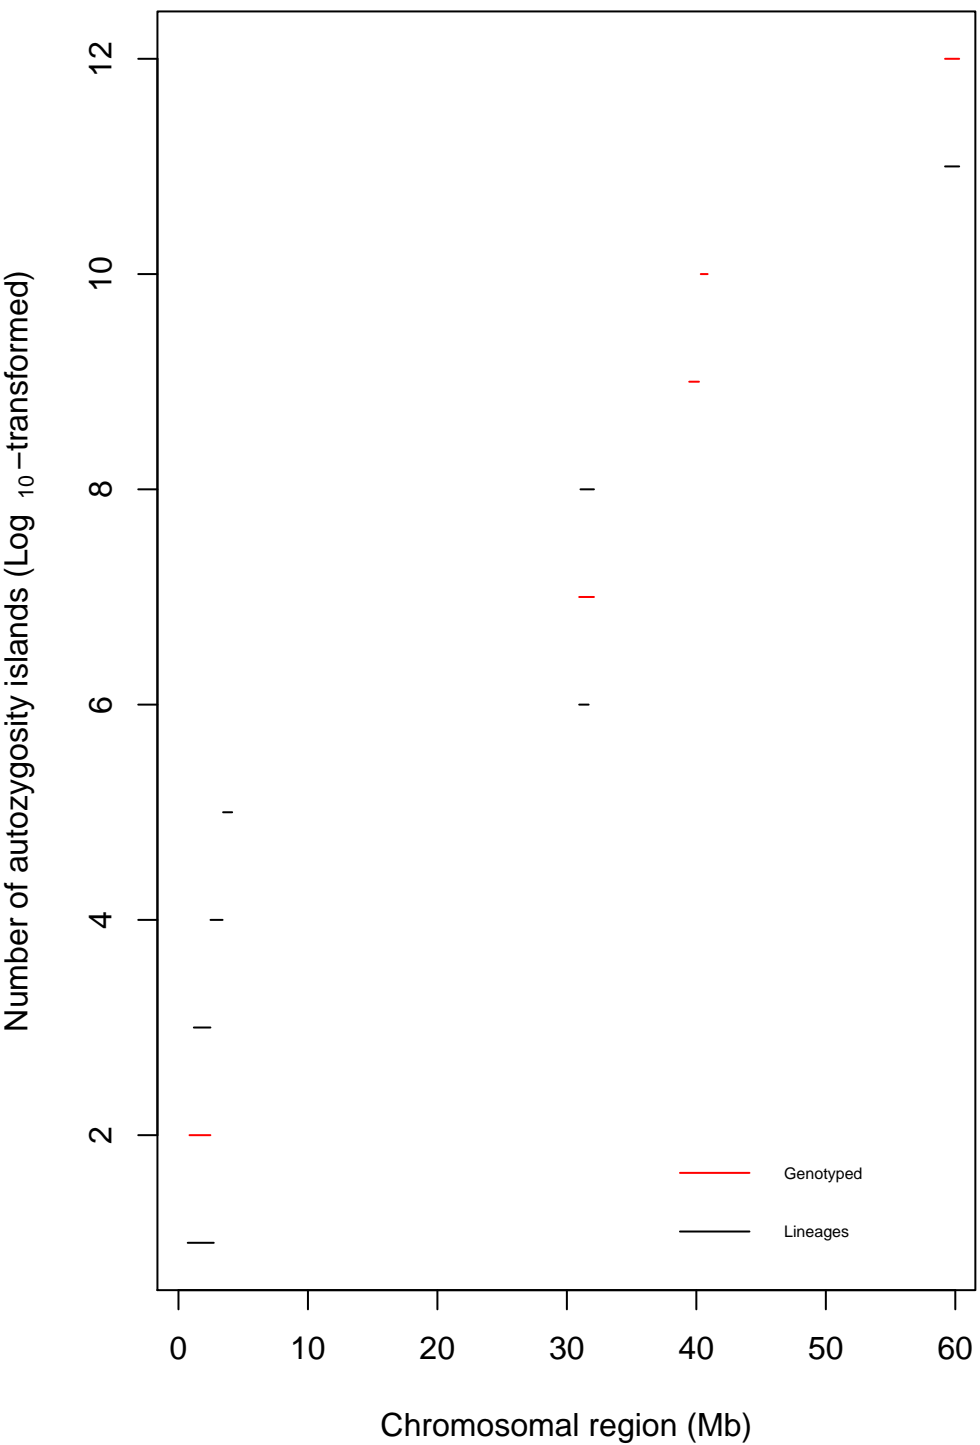**BTA3**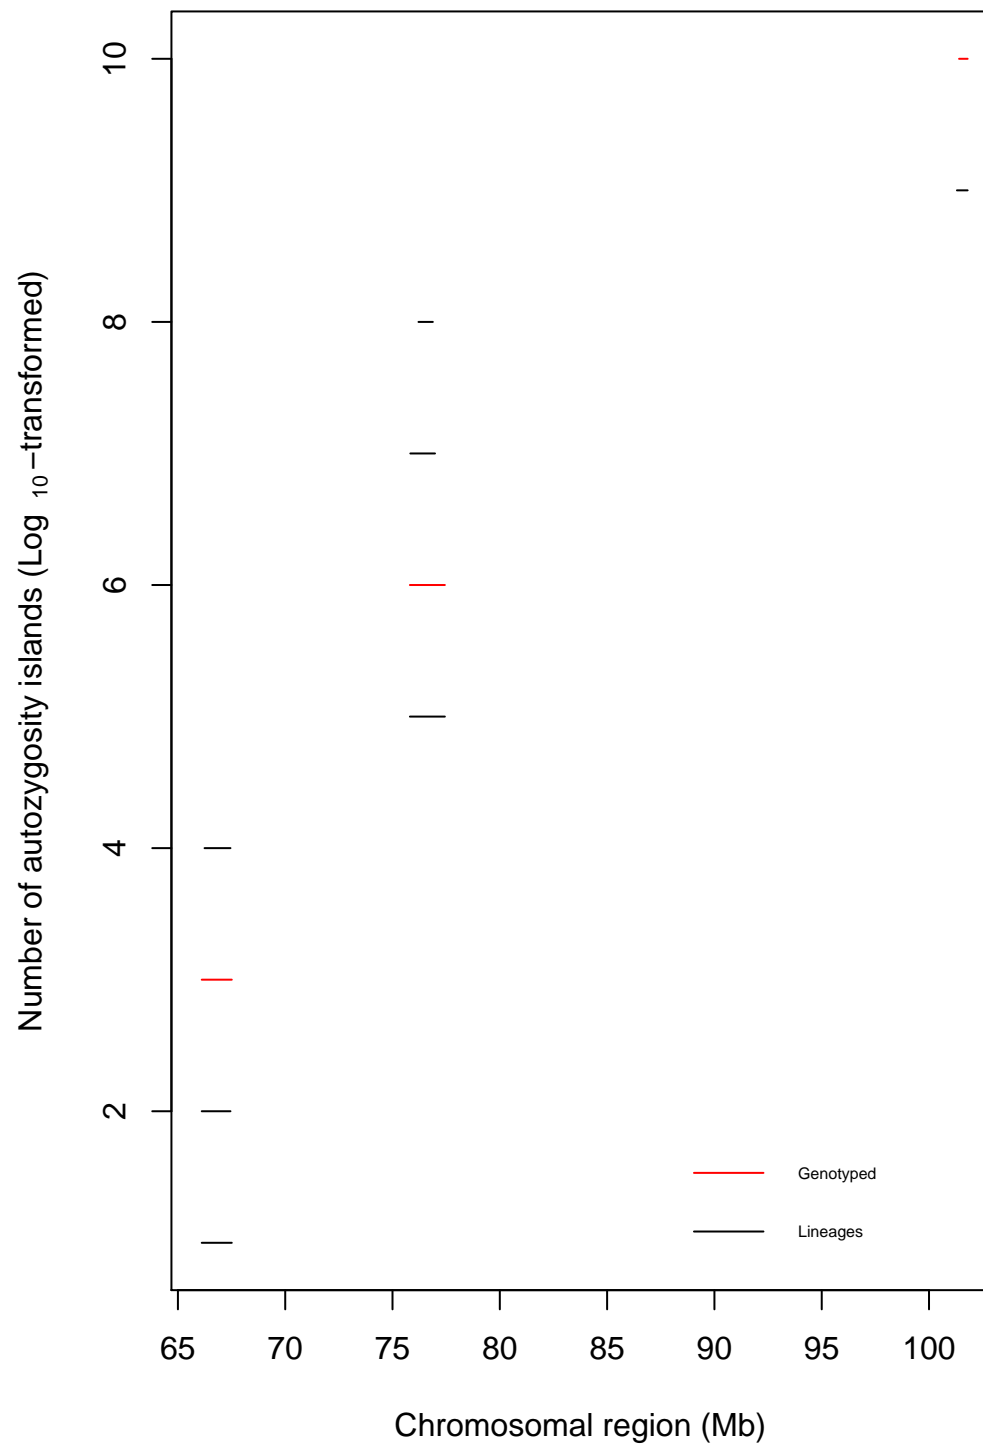

**BTA4**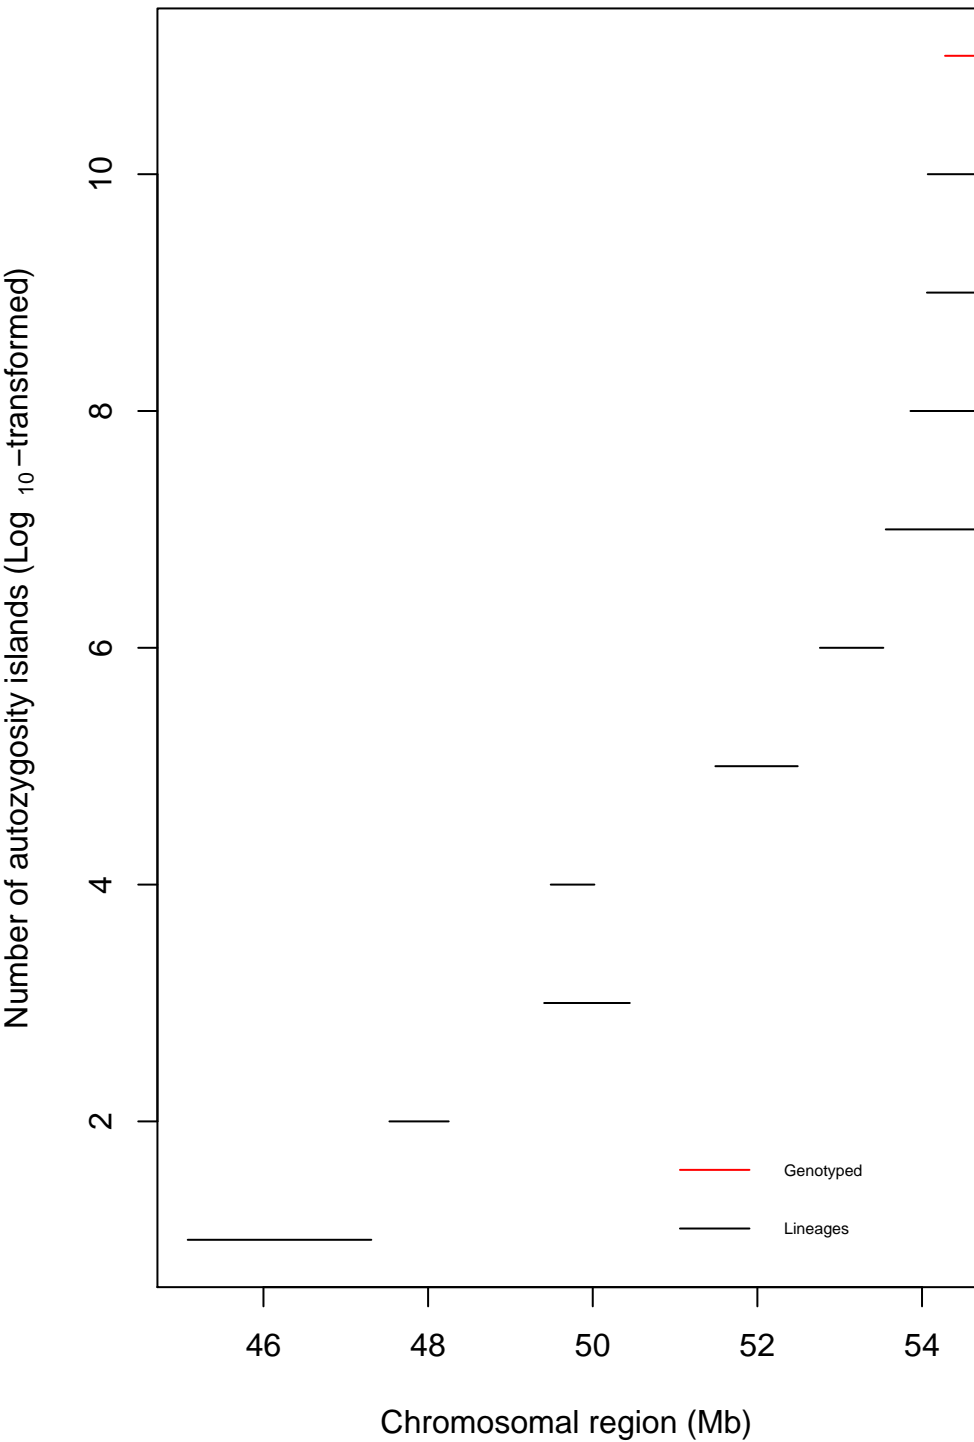**BTA5**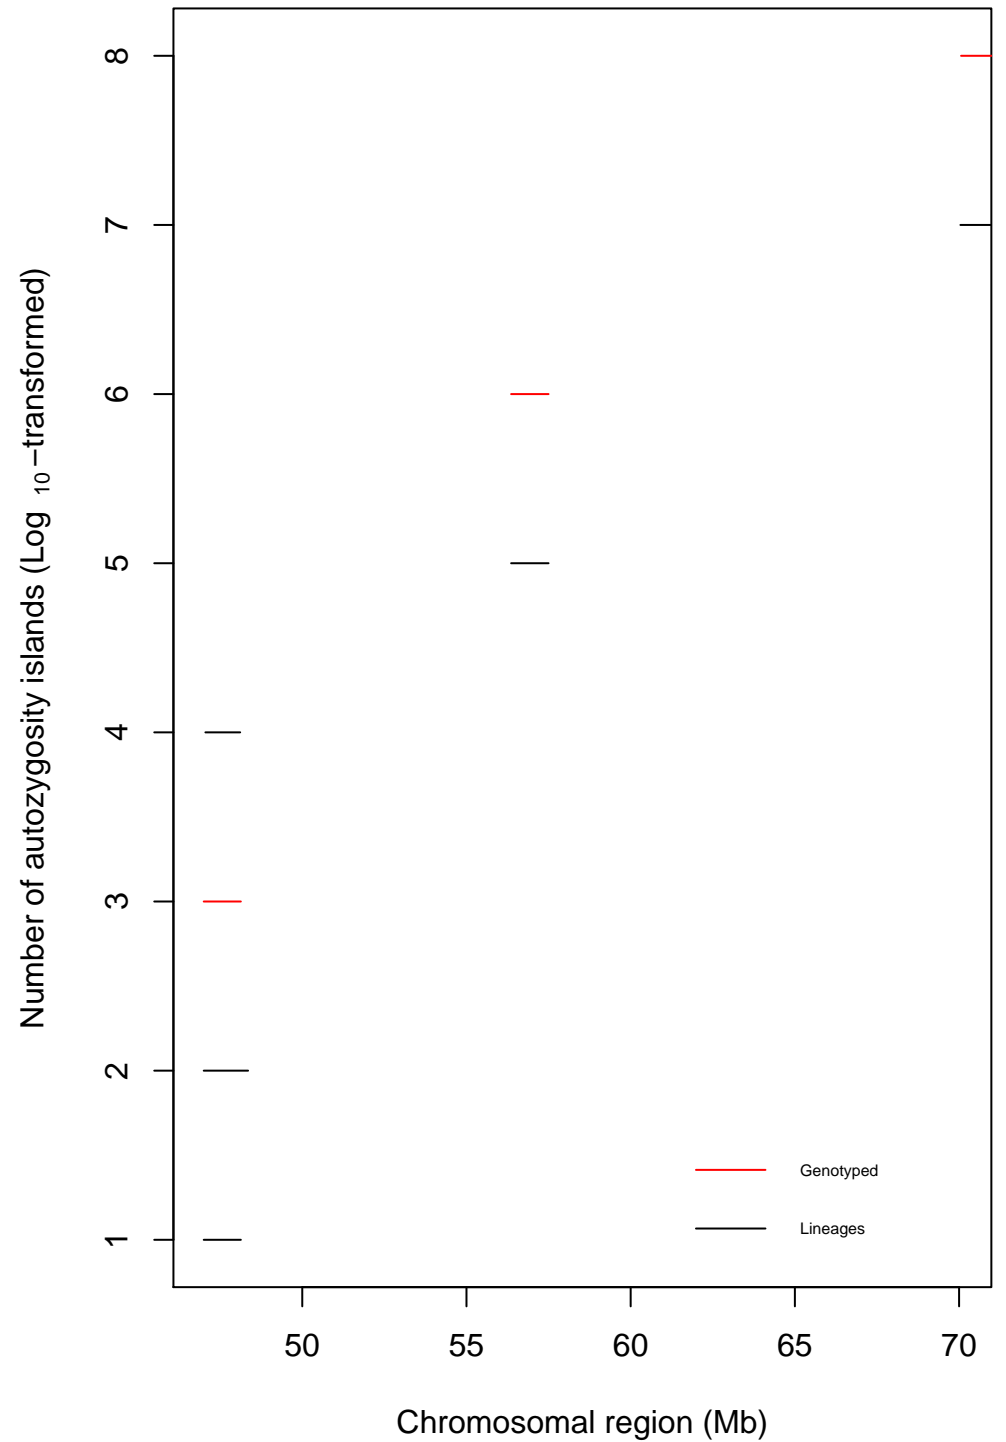

**BTA6**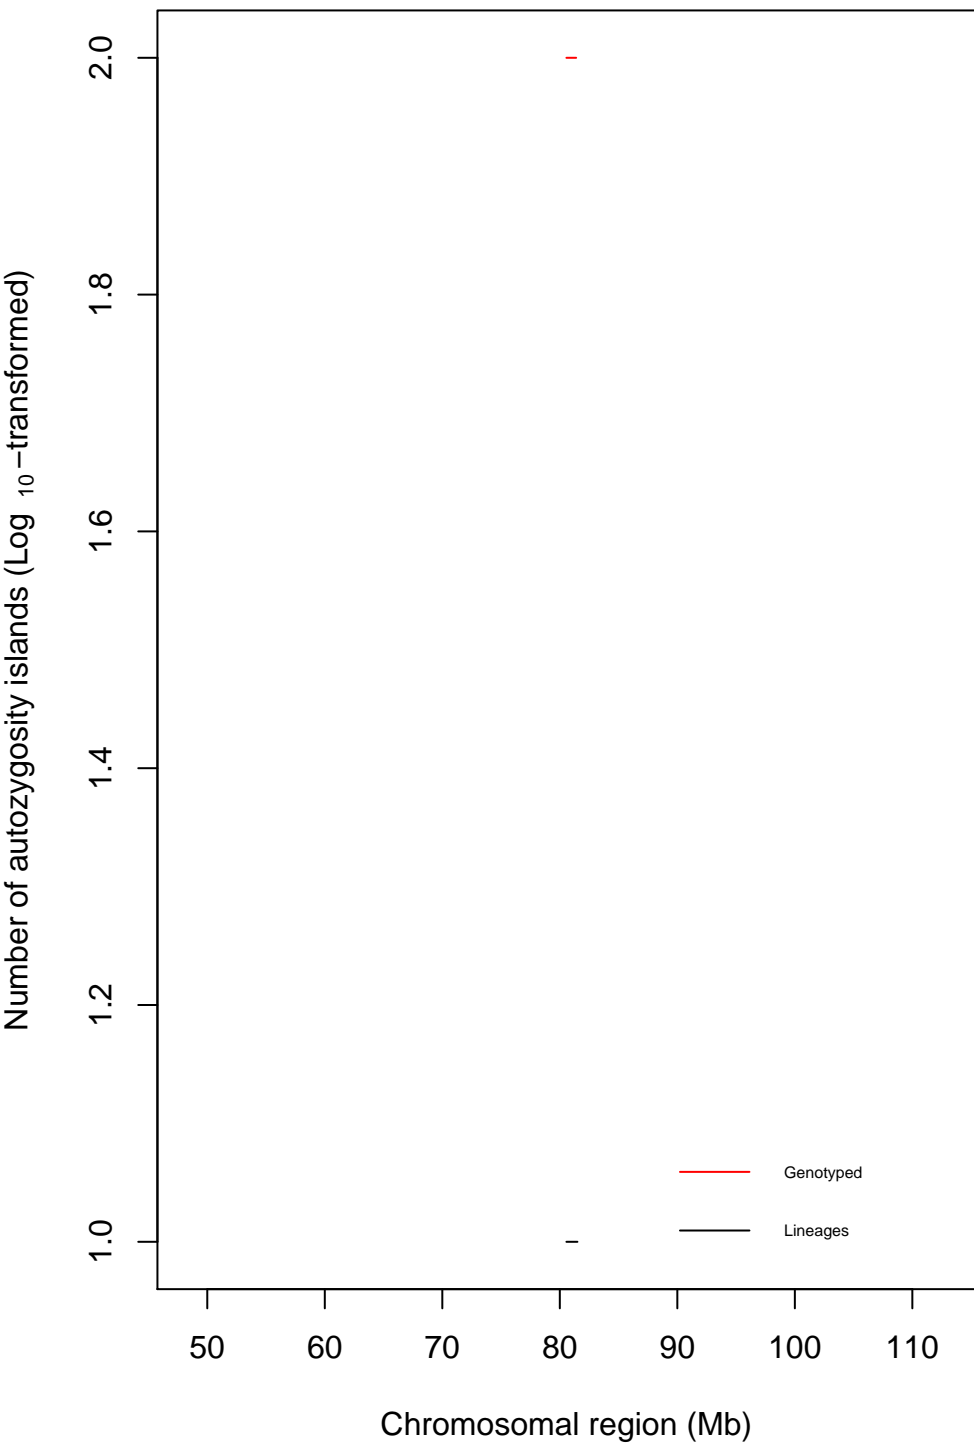**BTA7**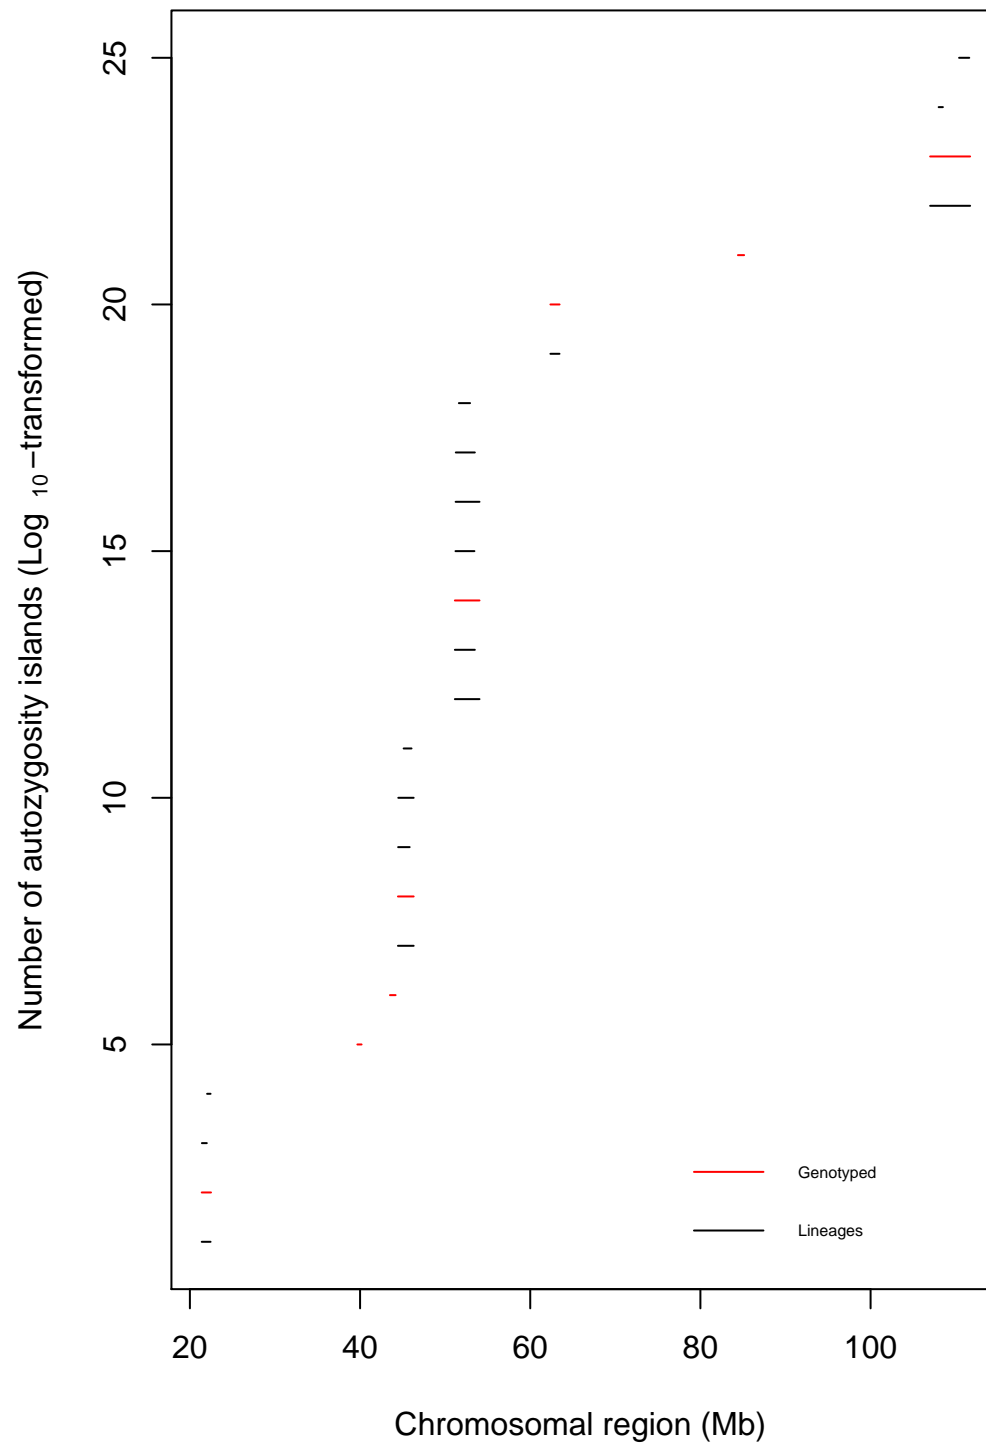

**BTA8**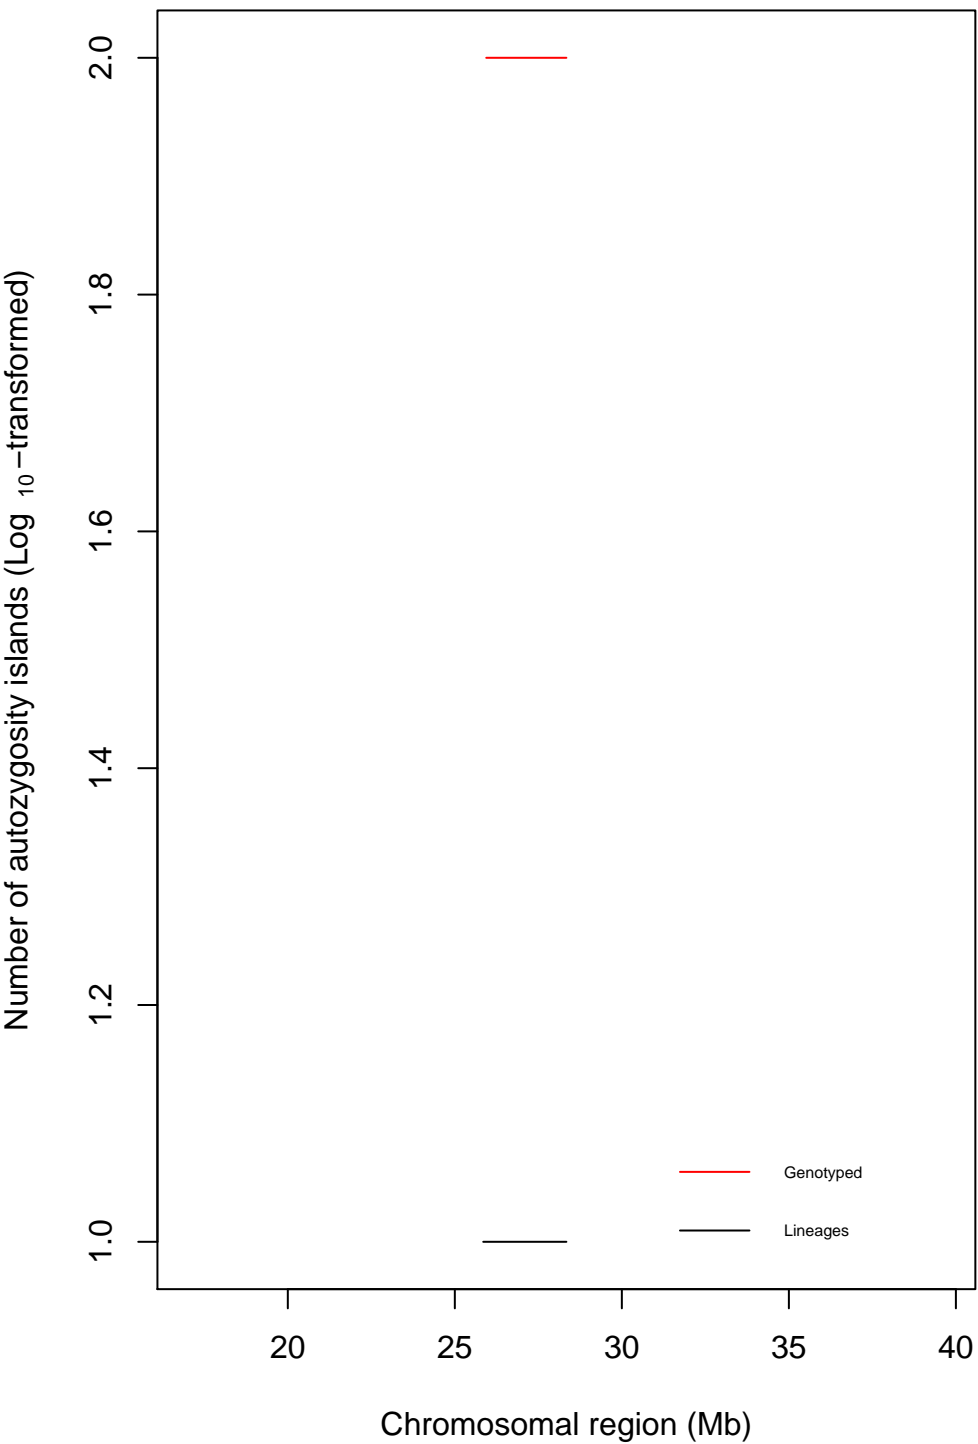**BTA9**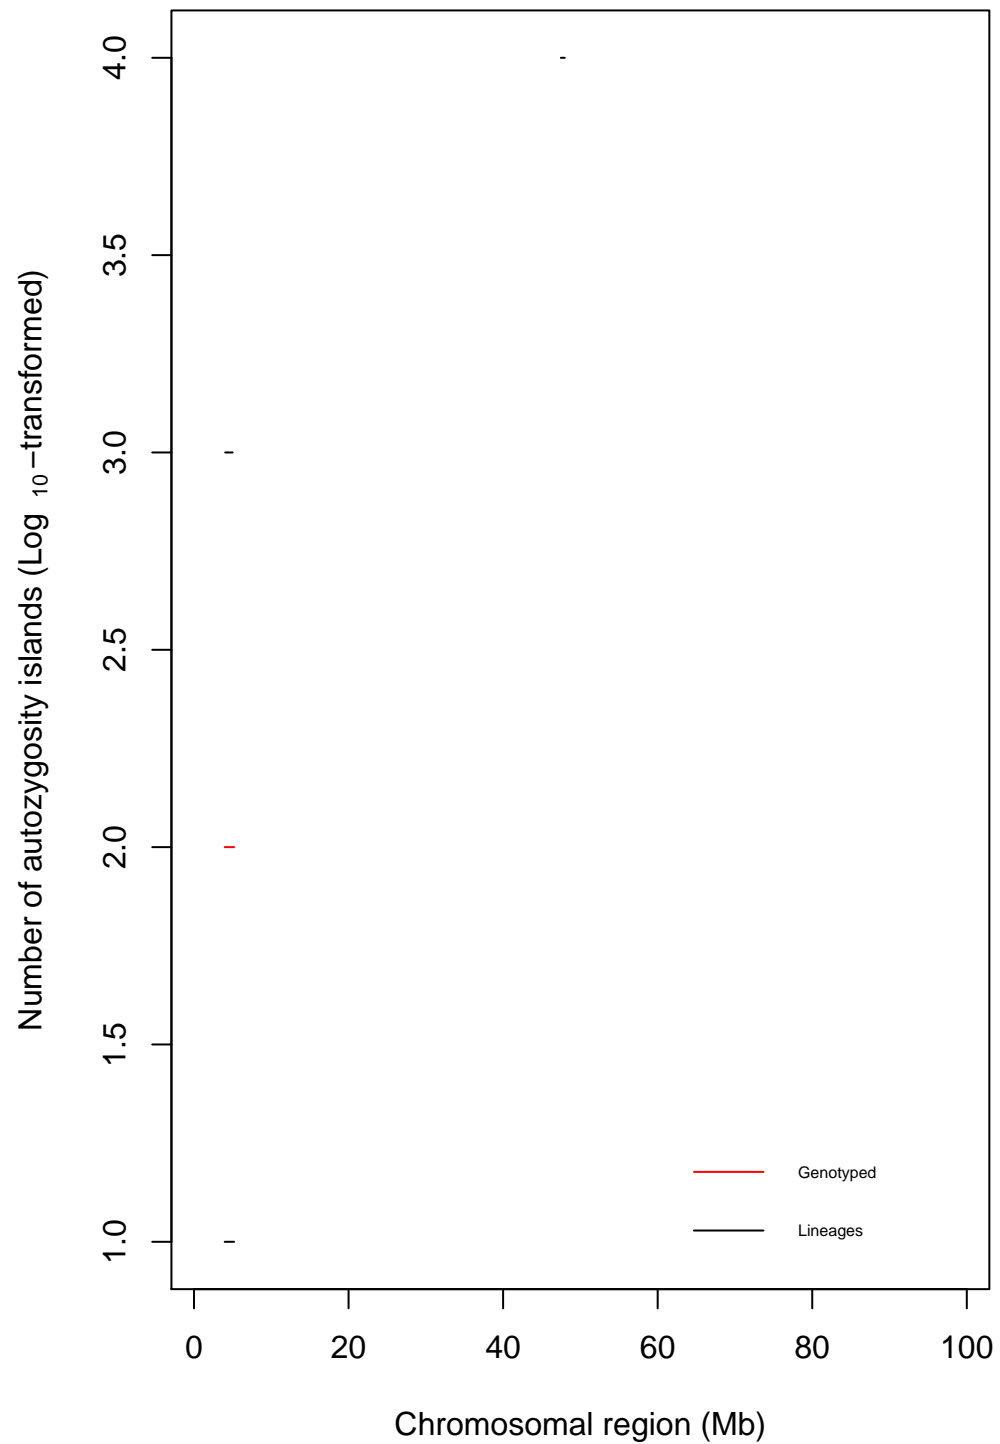

**BTA10**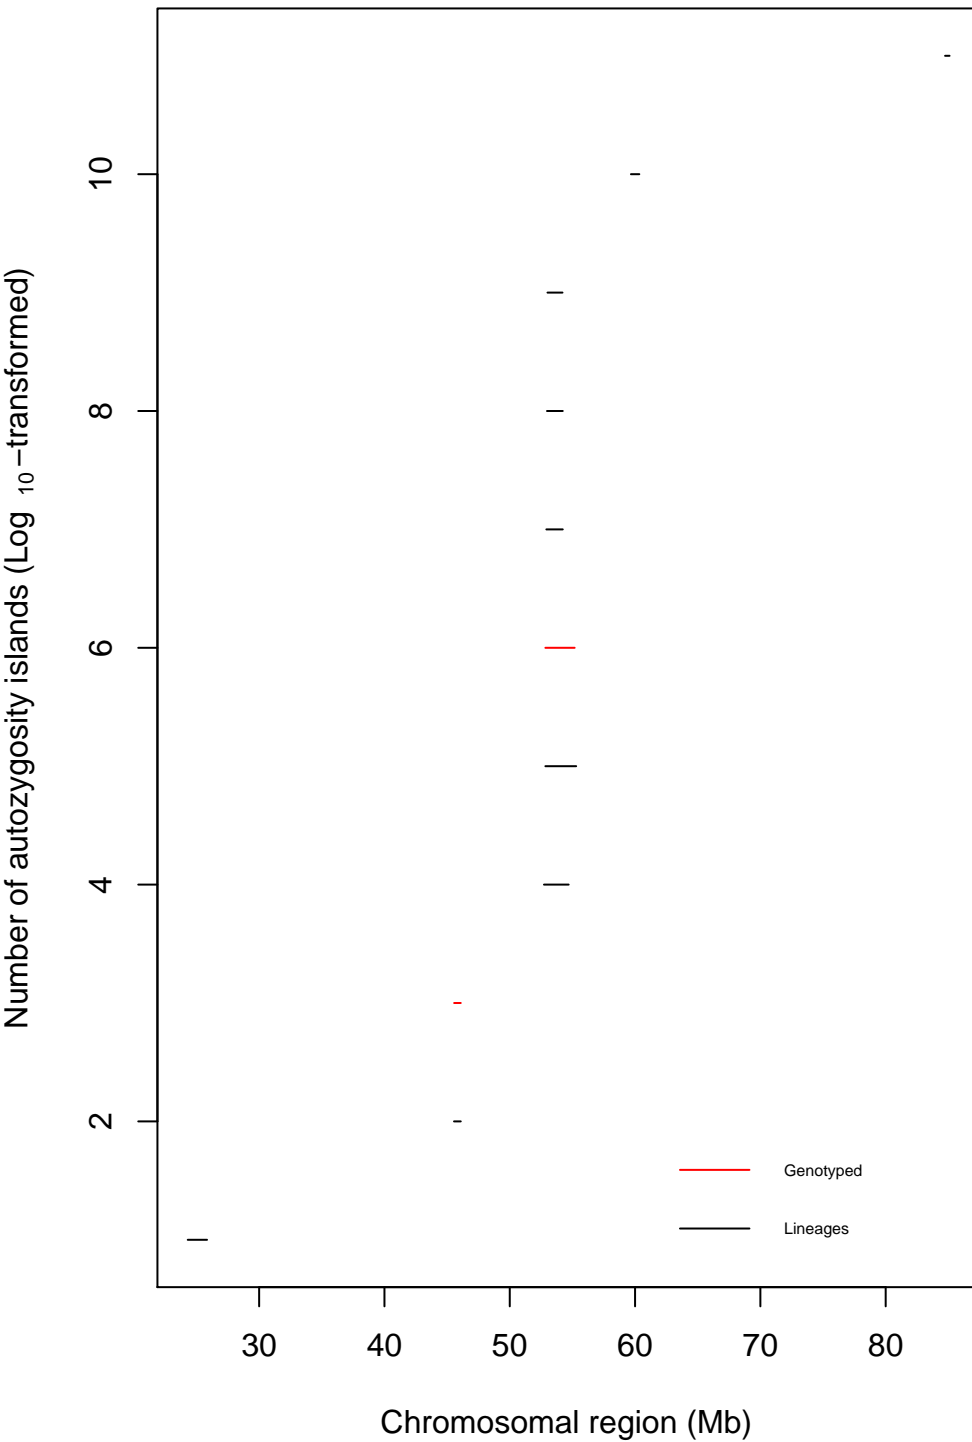**BTA11**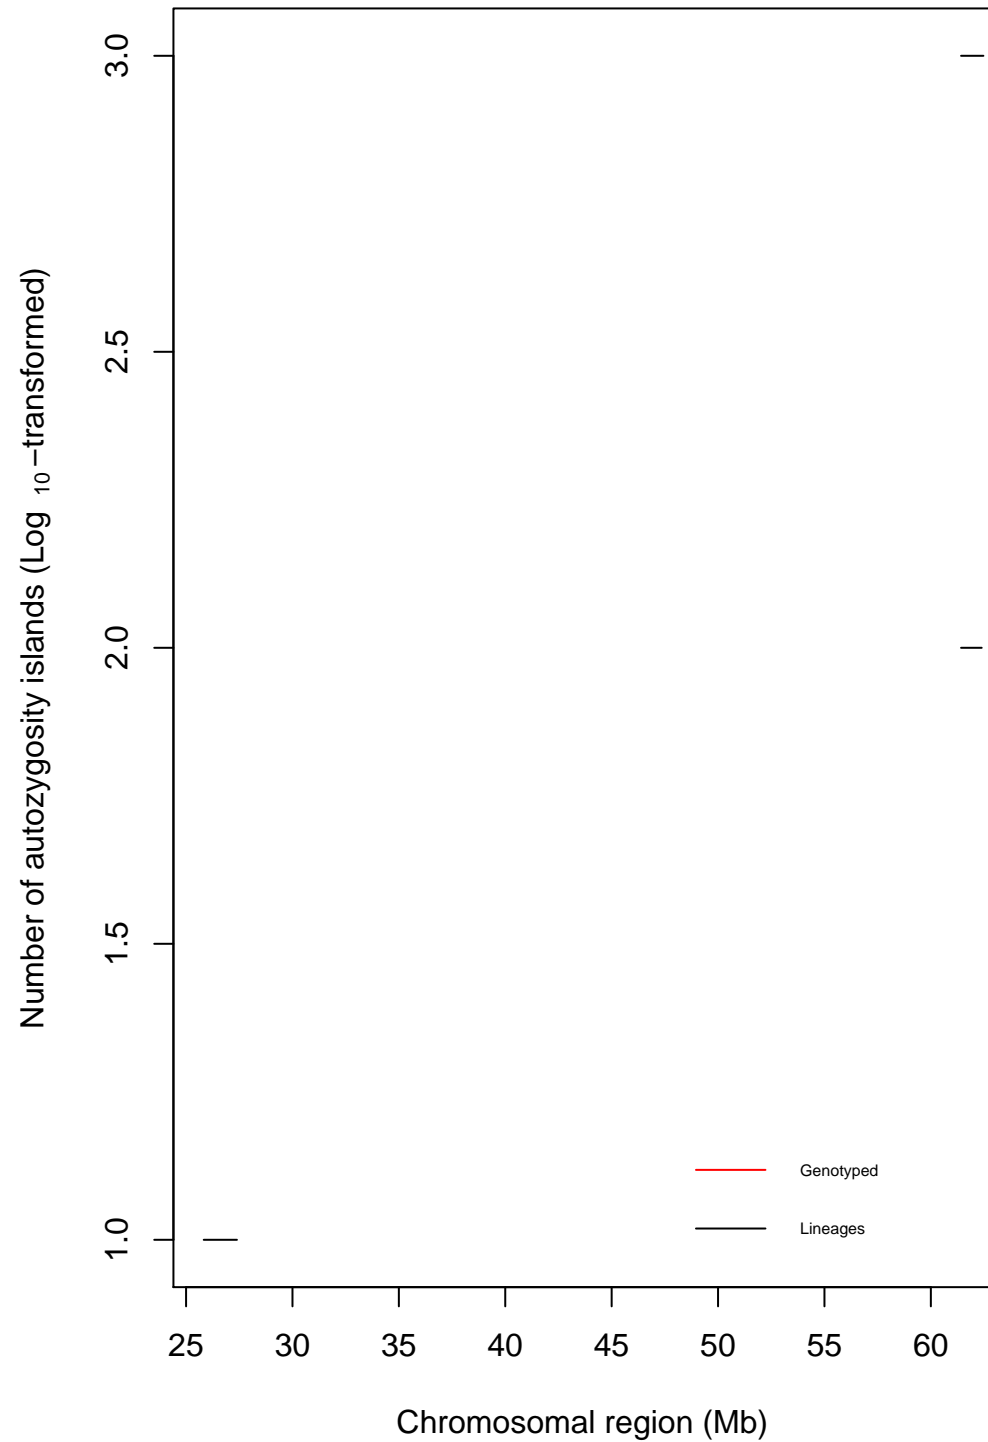

**BTA12**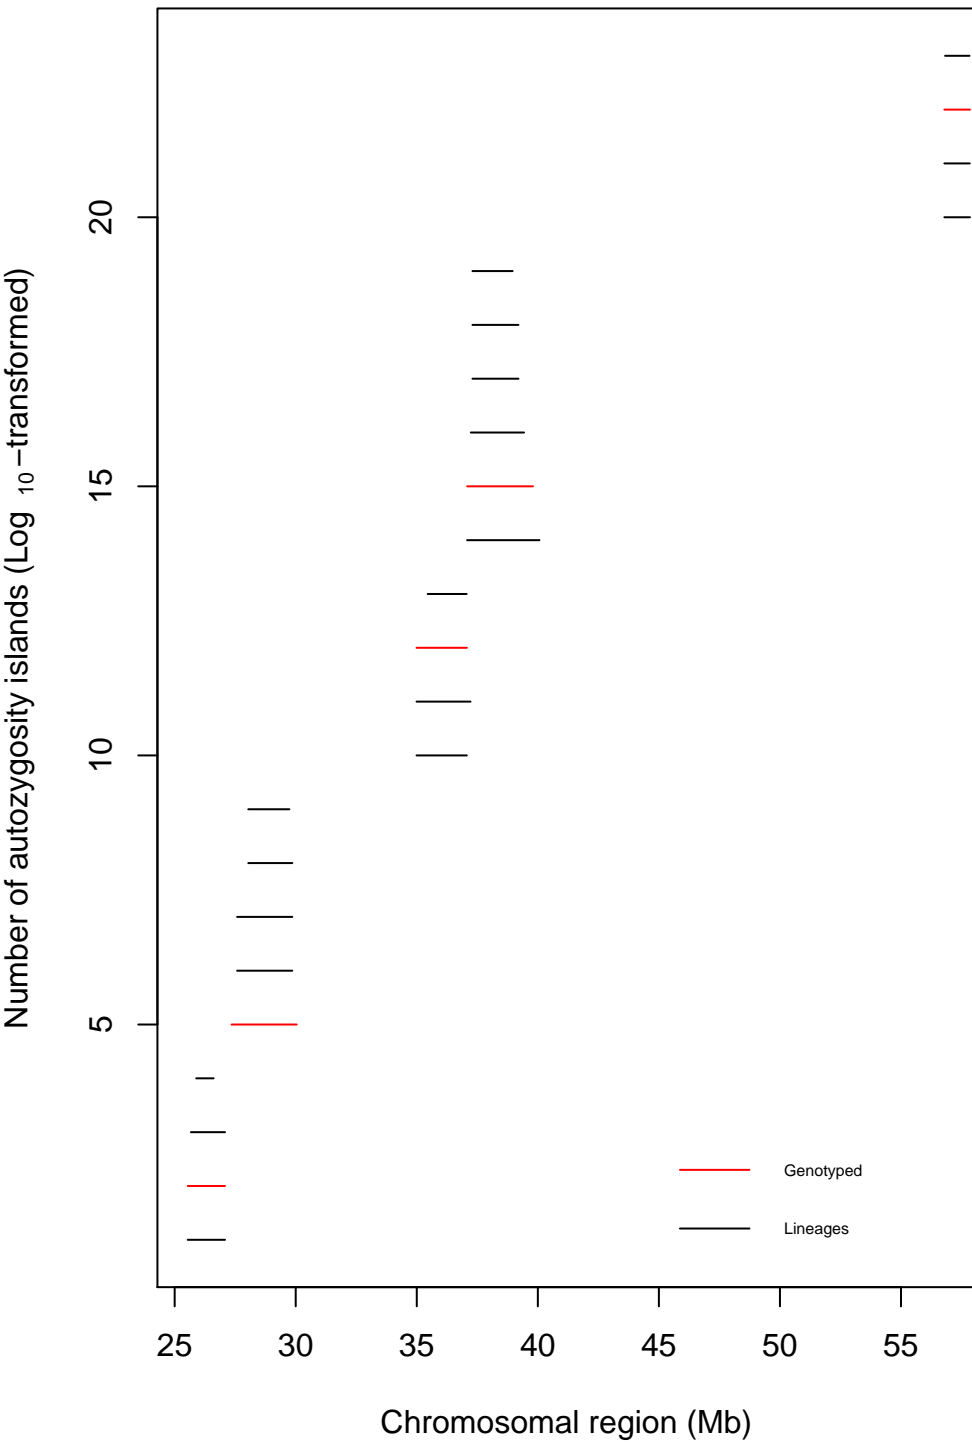**BTA13**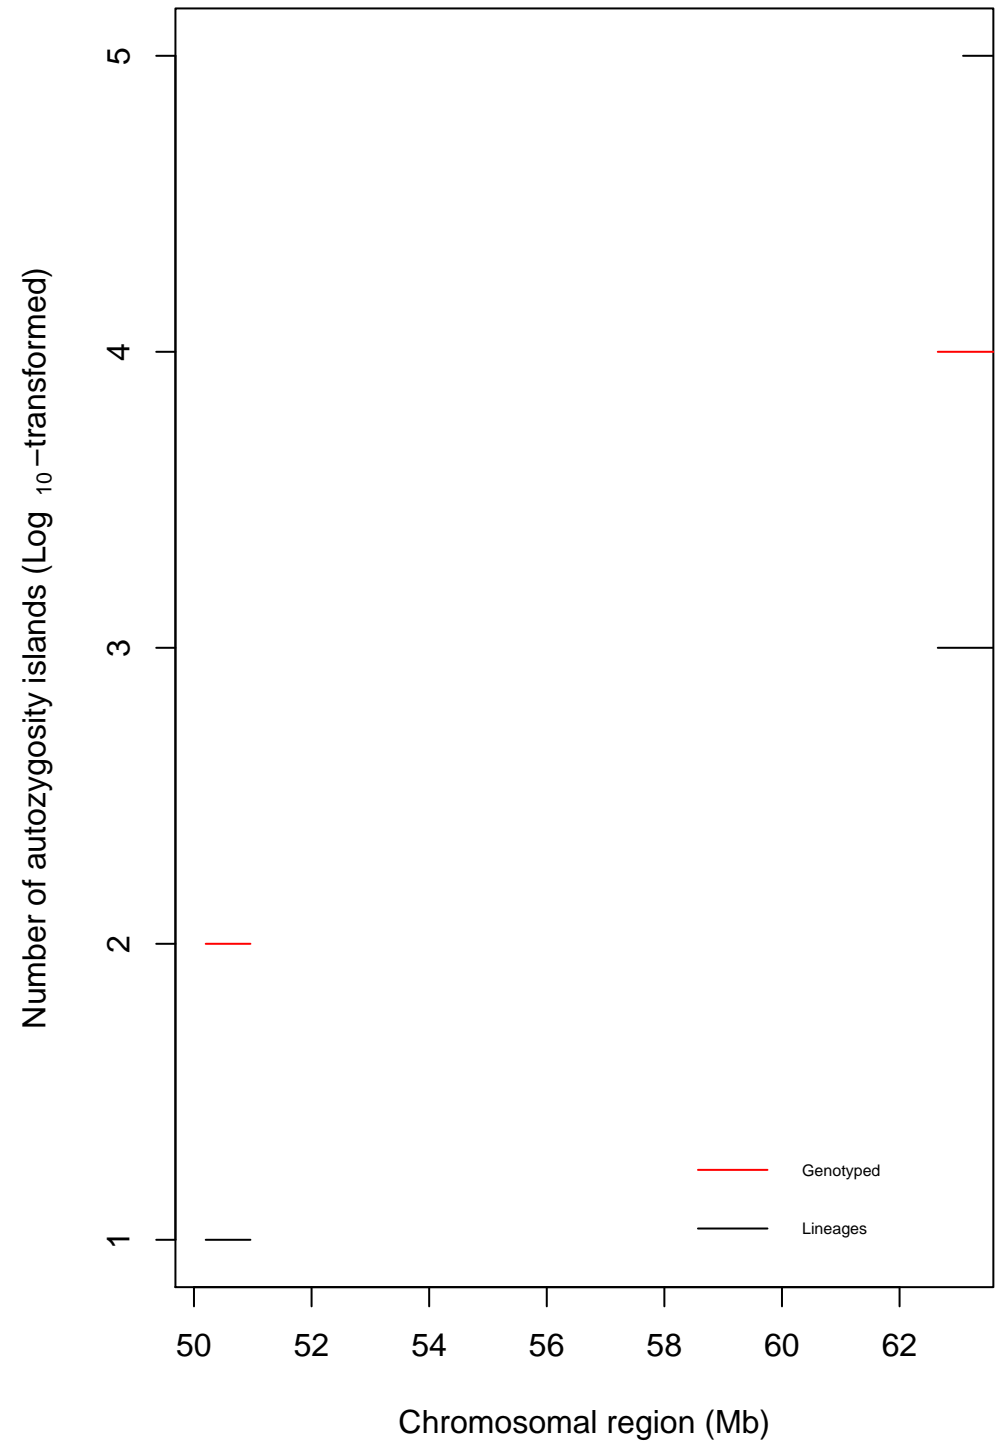

**BTA14**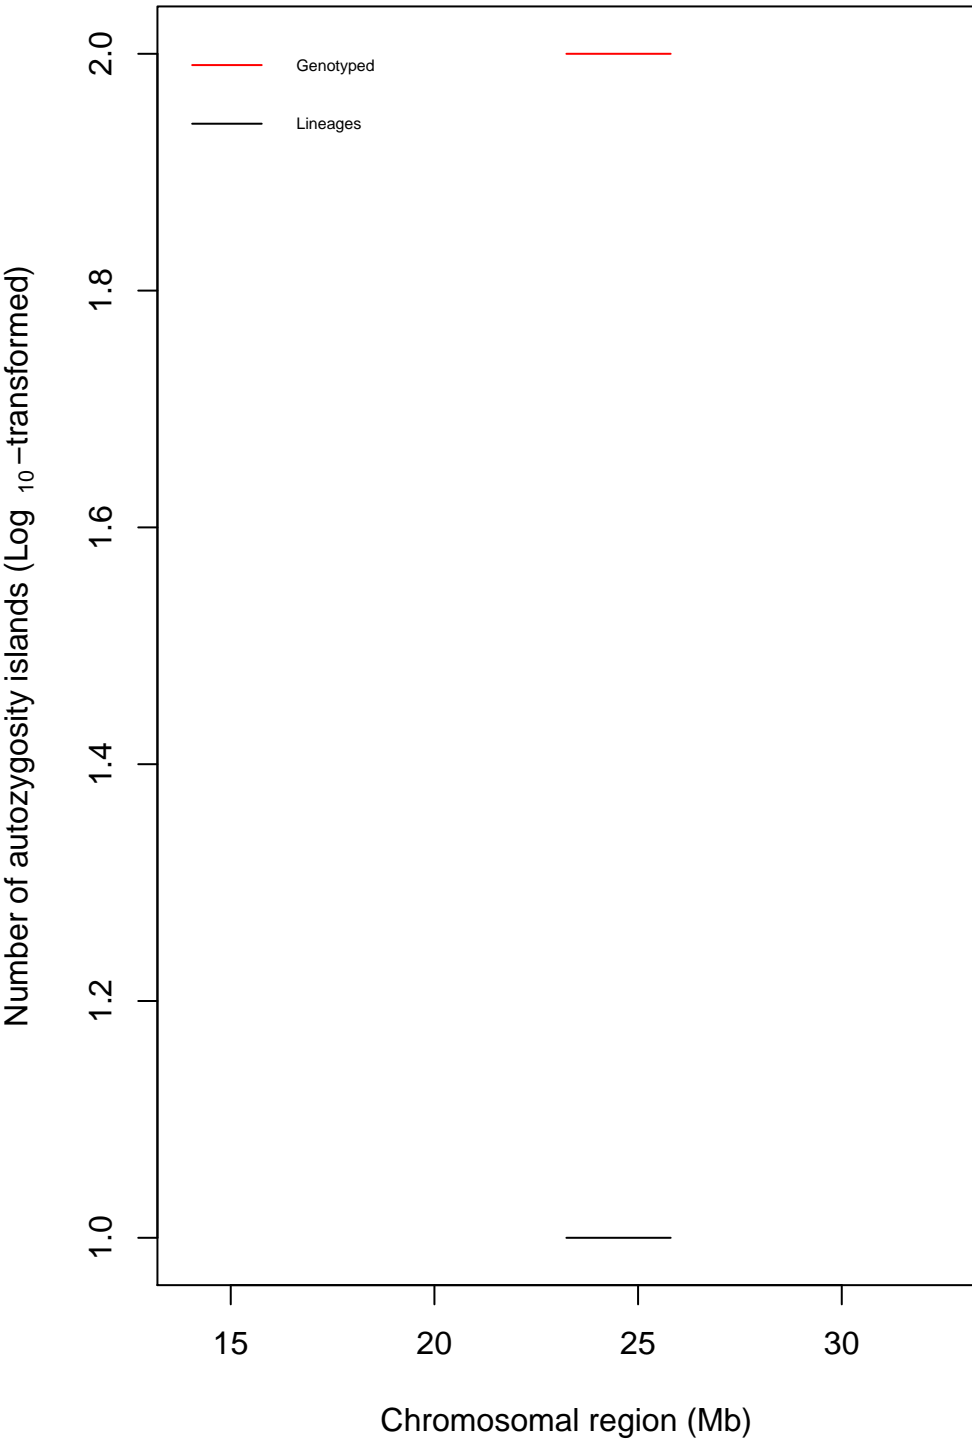**BTA15**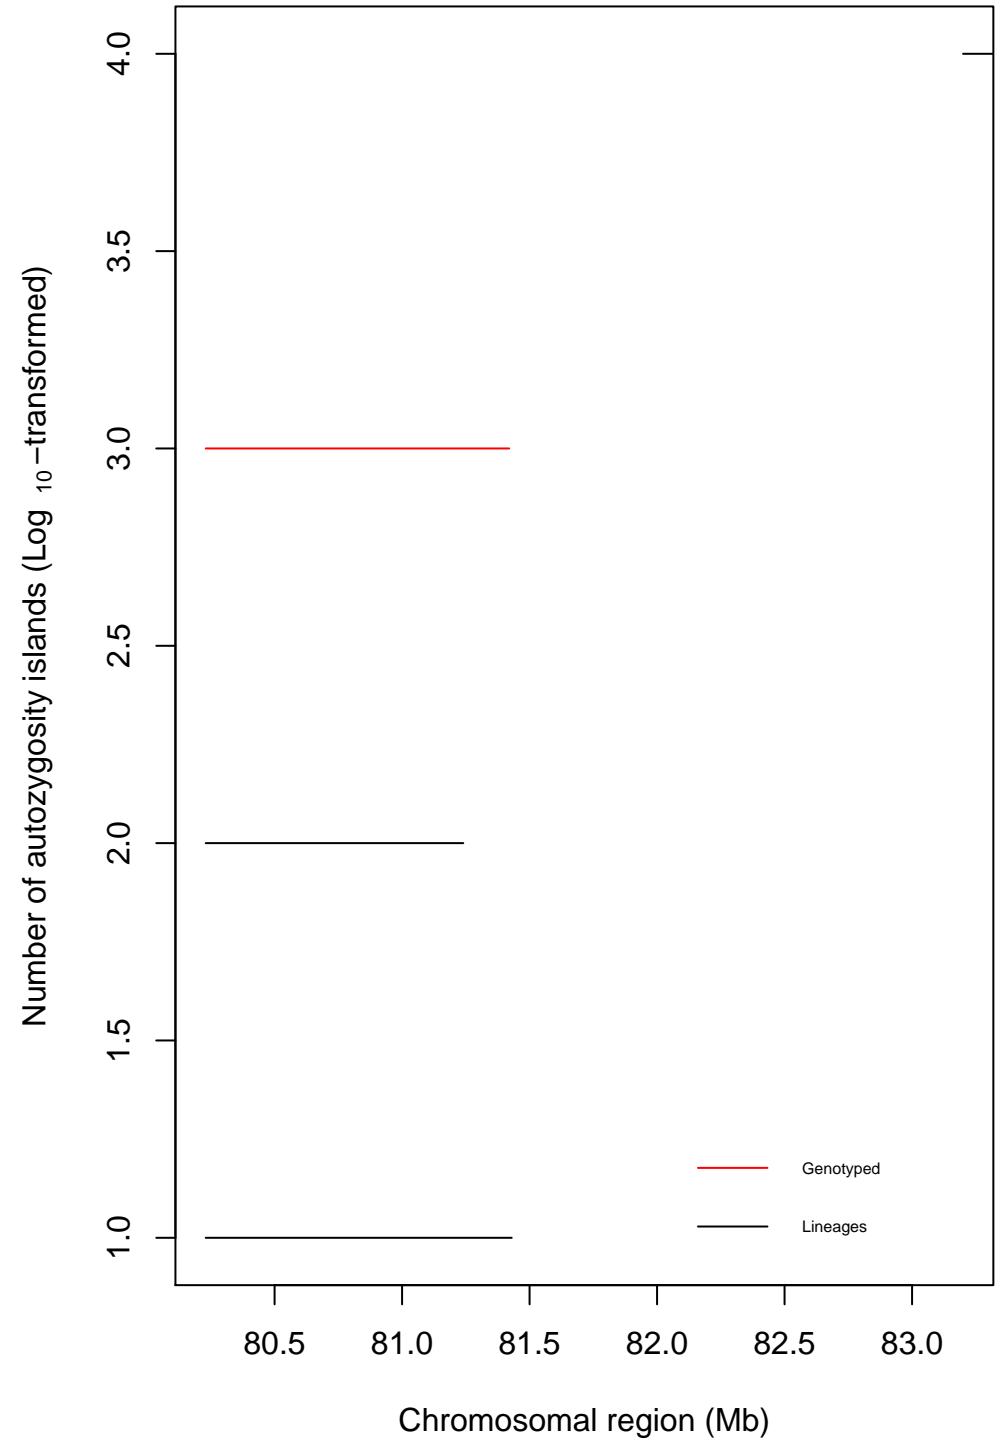

**BTA16**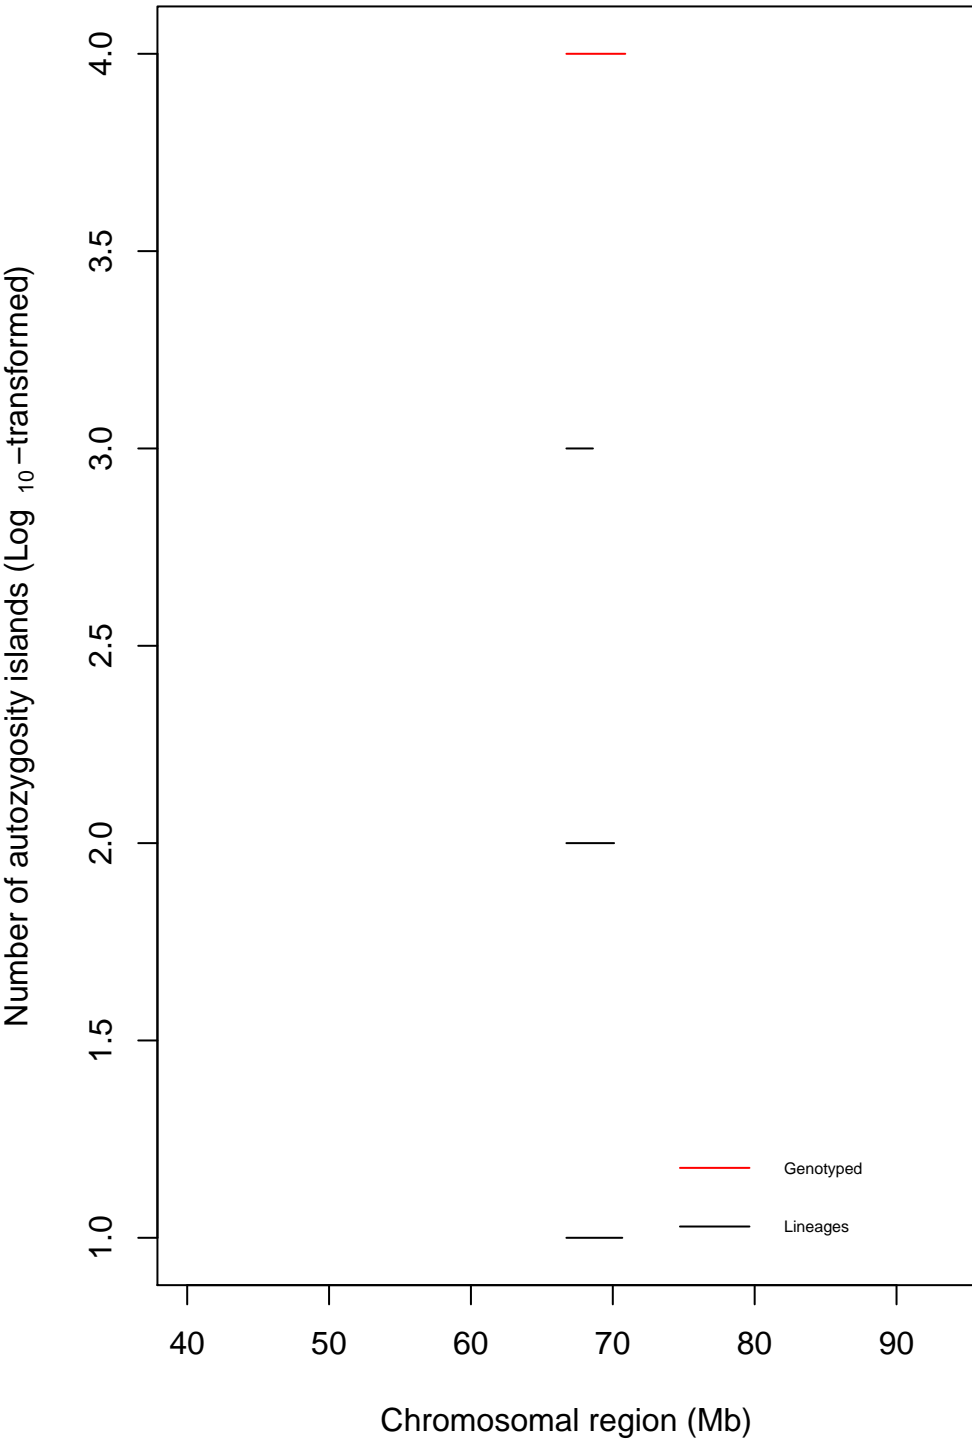**BTA17**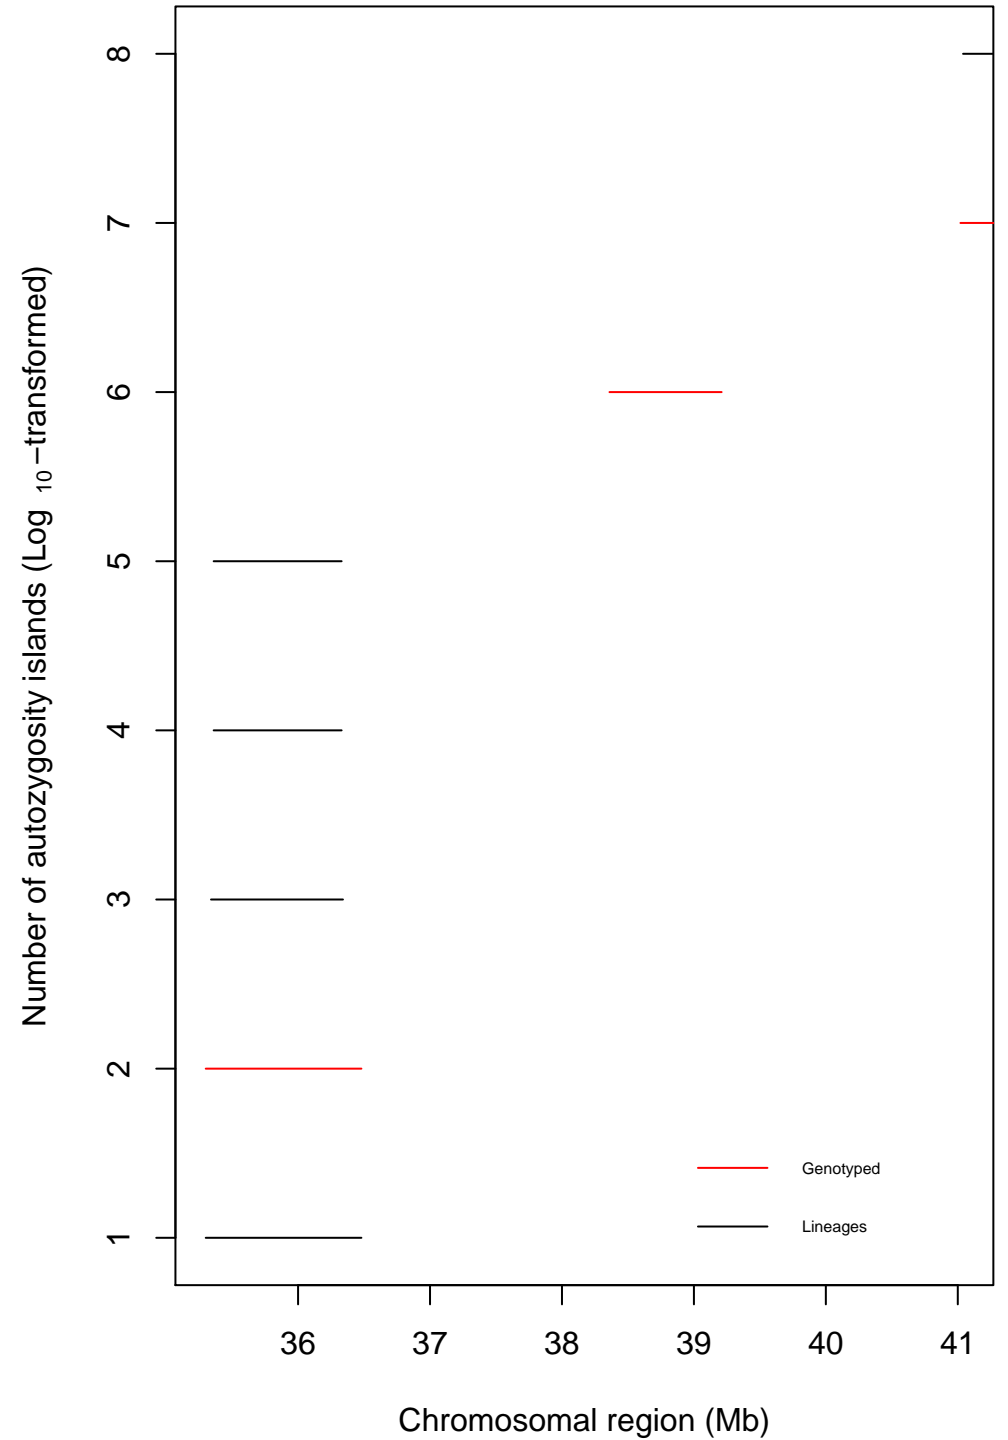



**BTA19**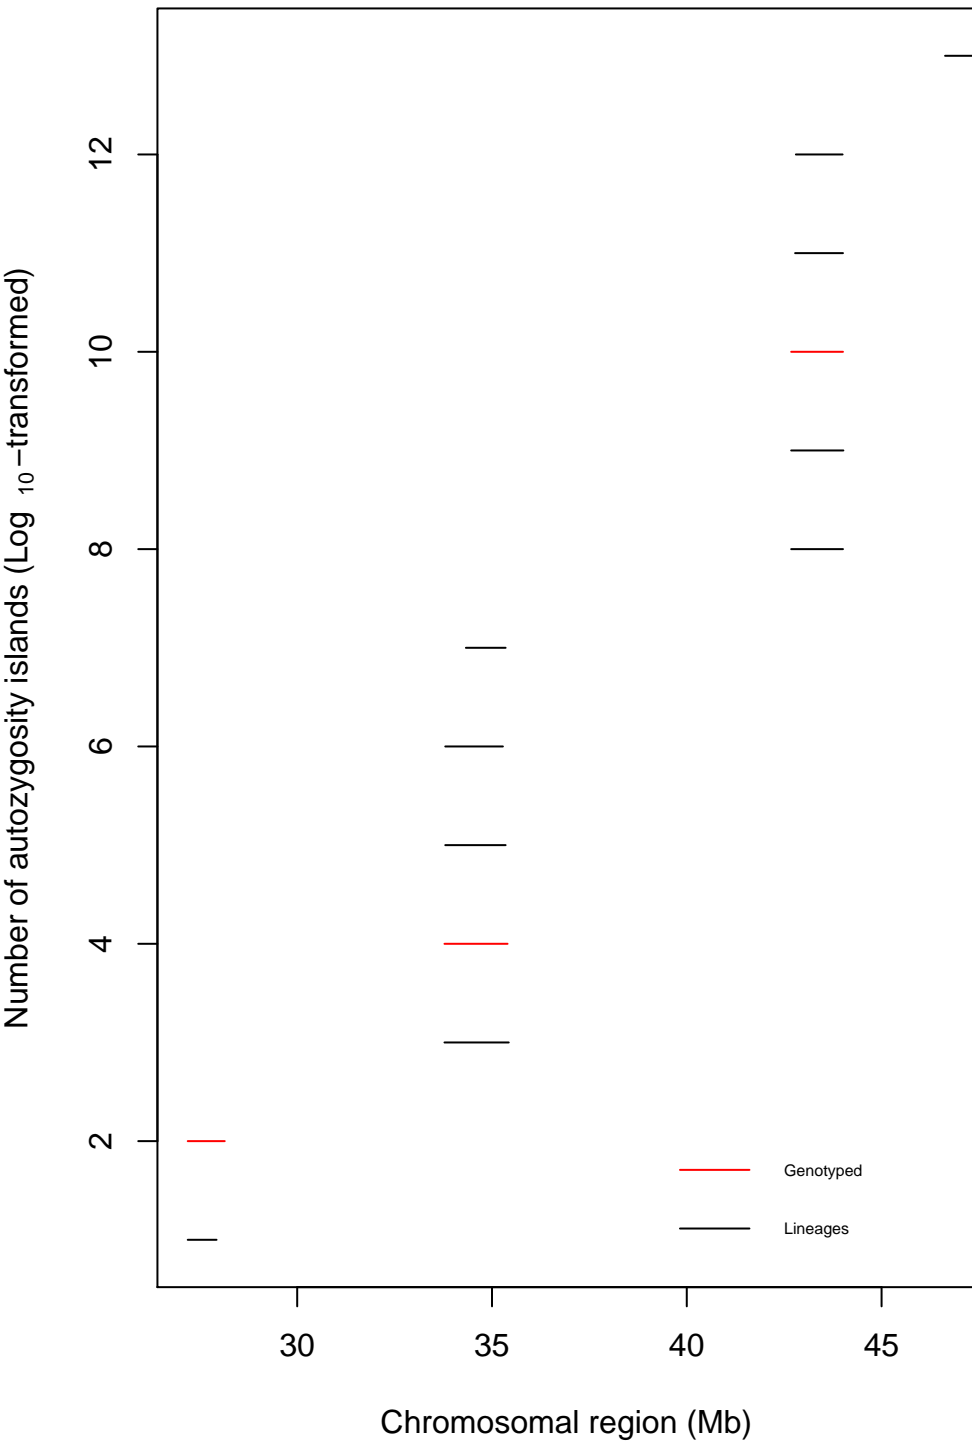**BTA20**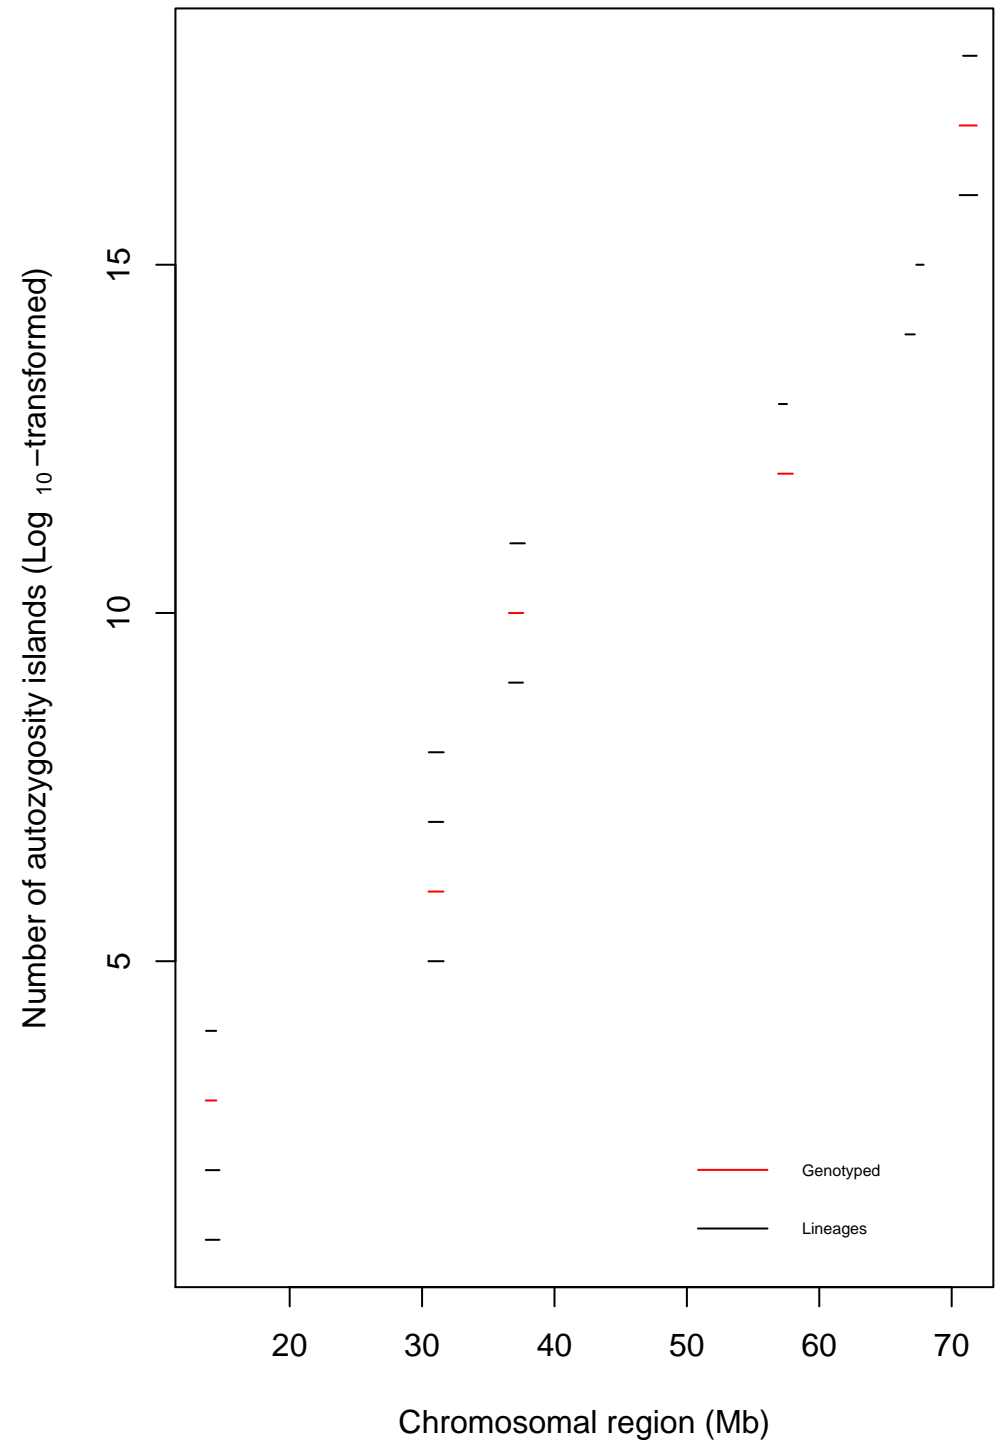

**BTA21**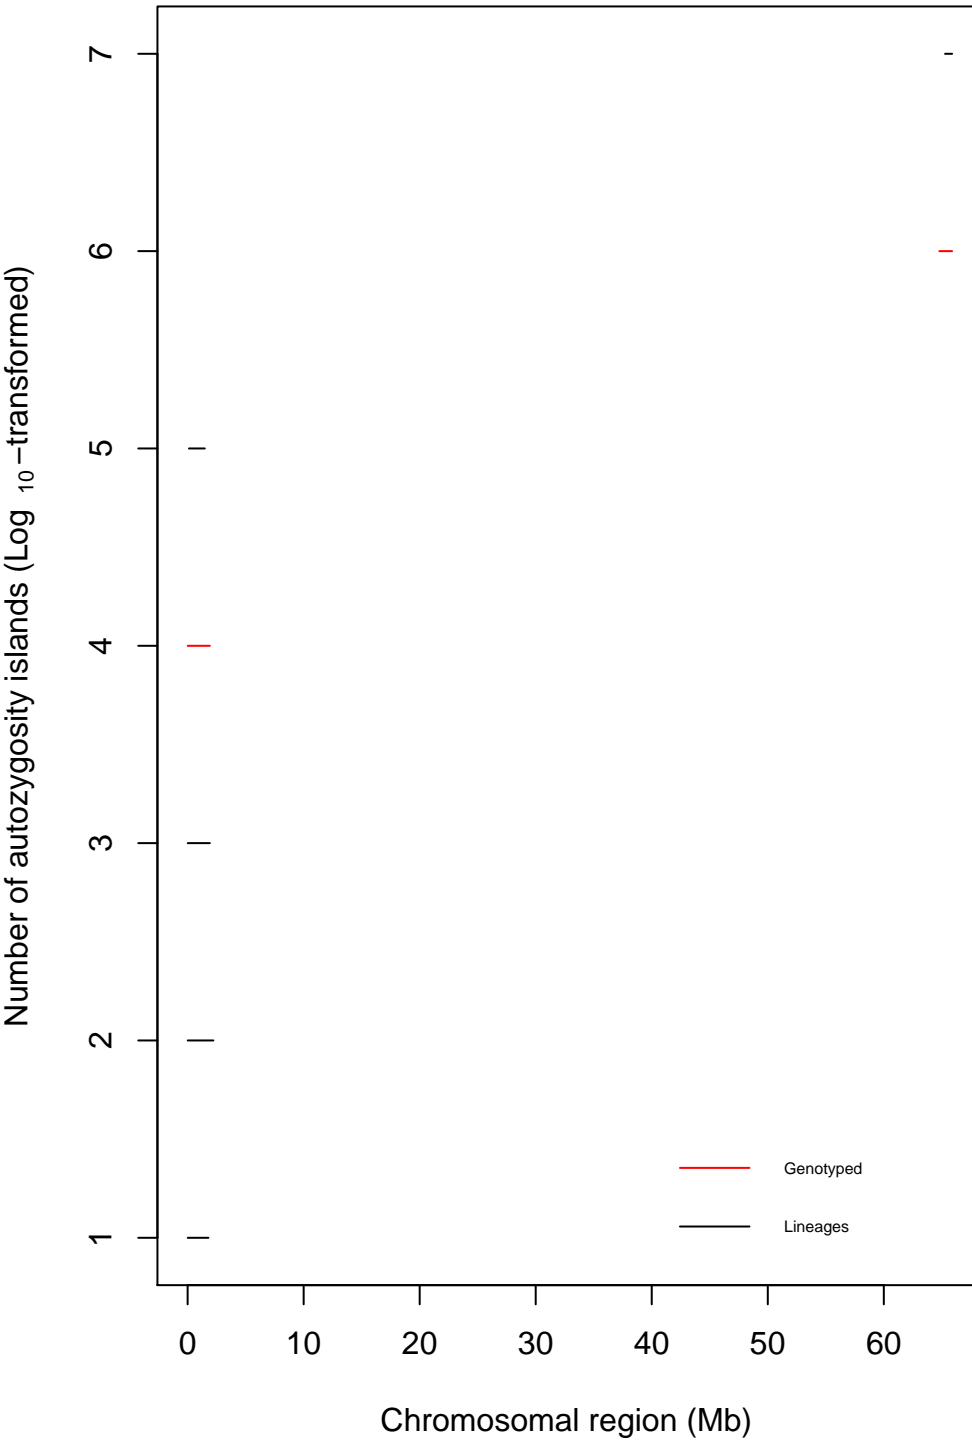**BTA22**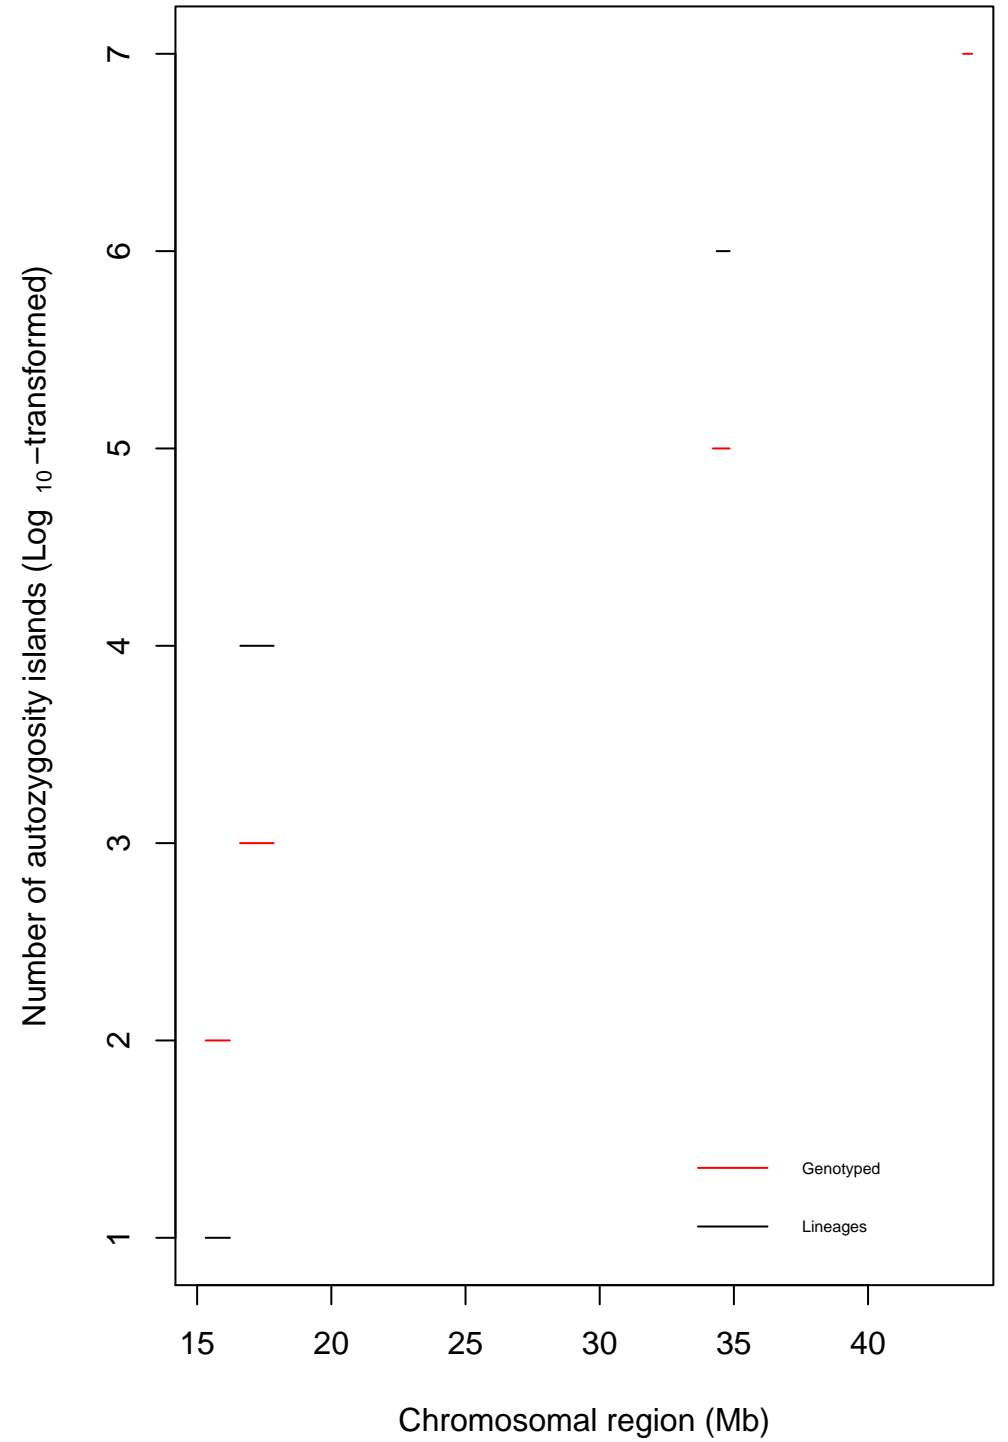

**BTA23**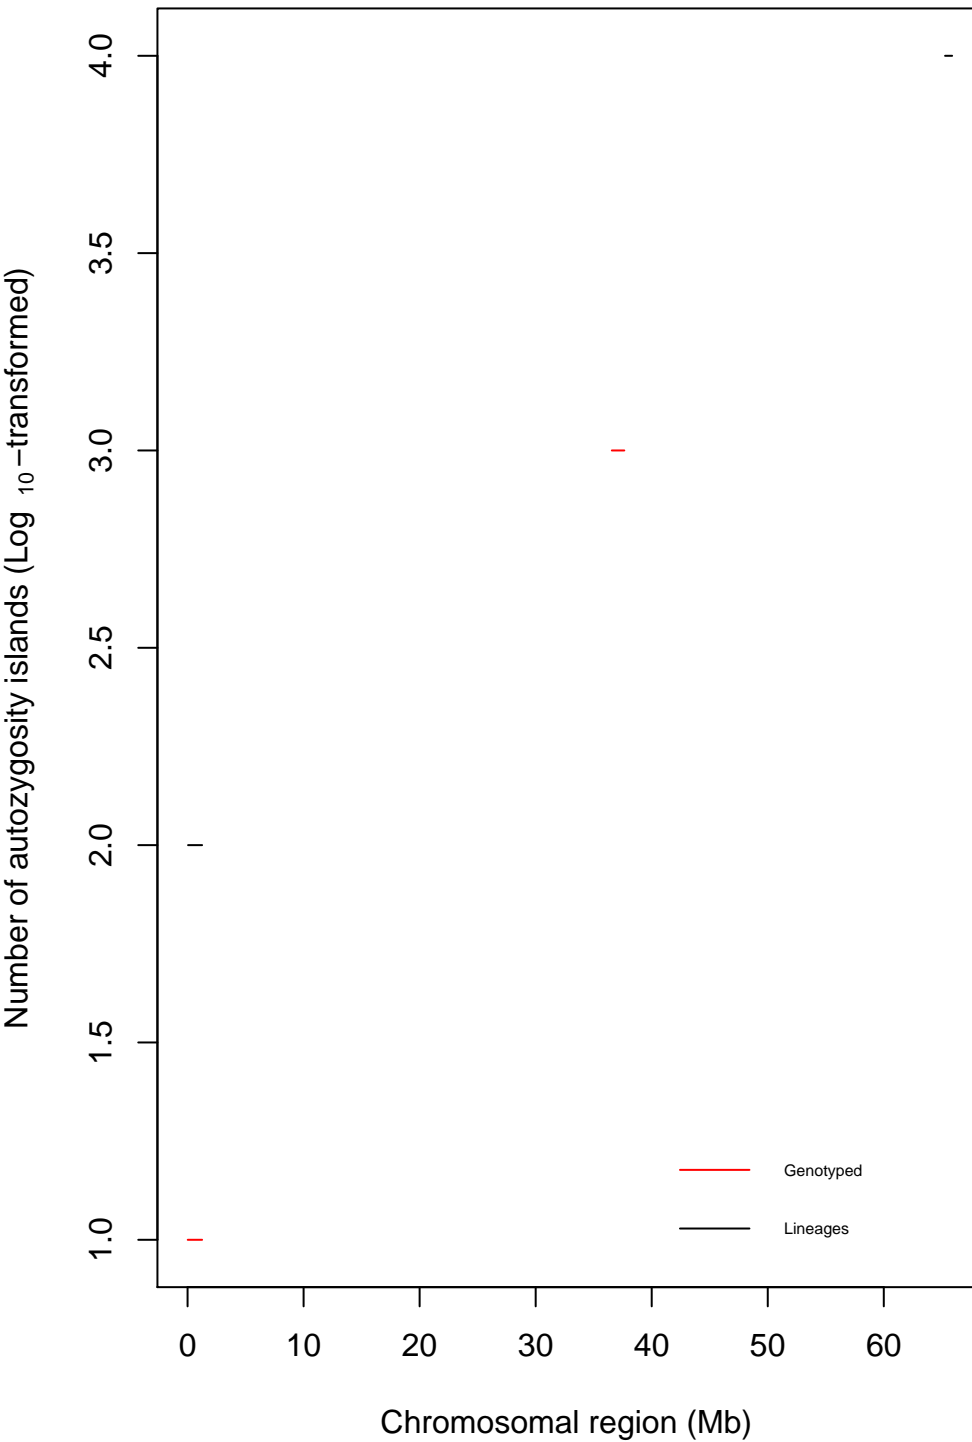**BTA24**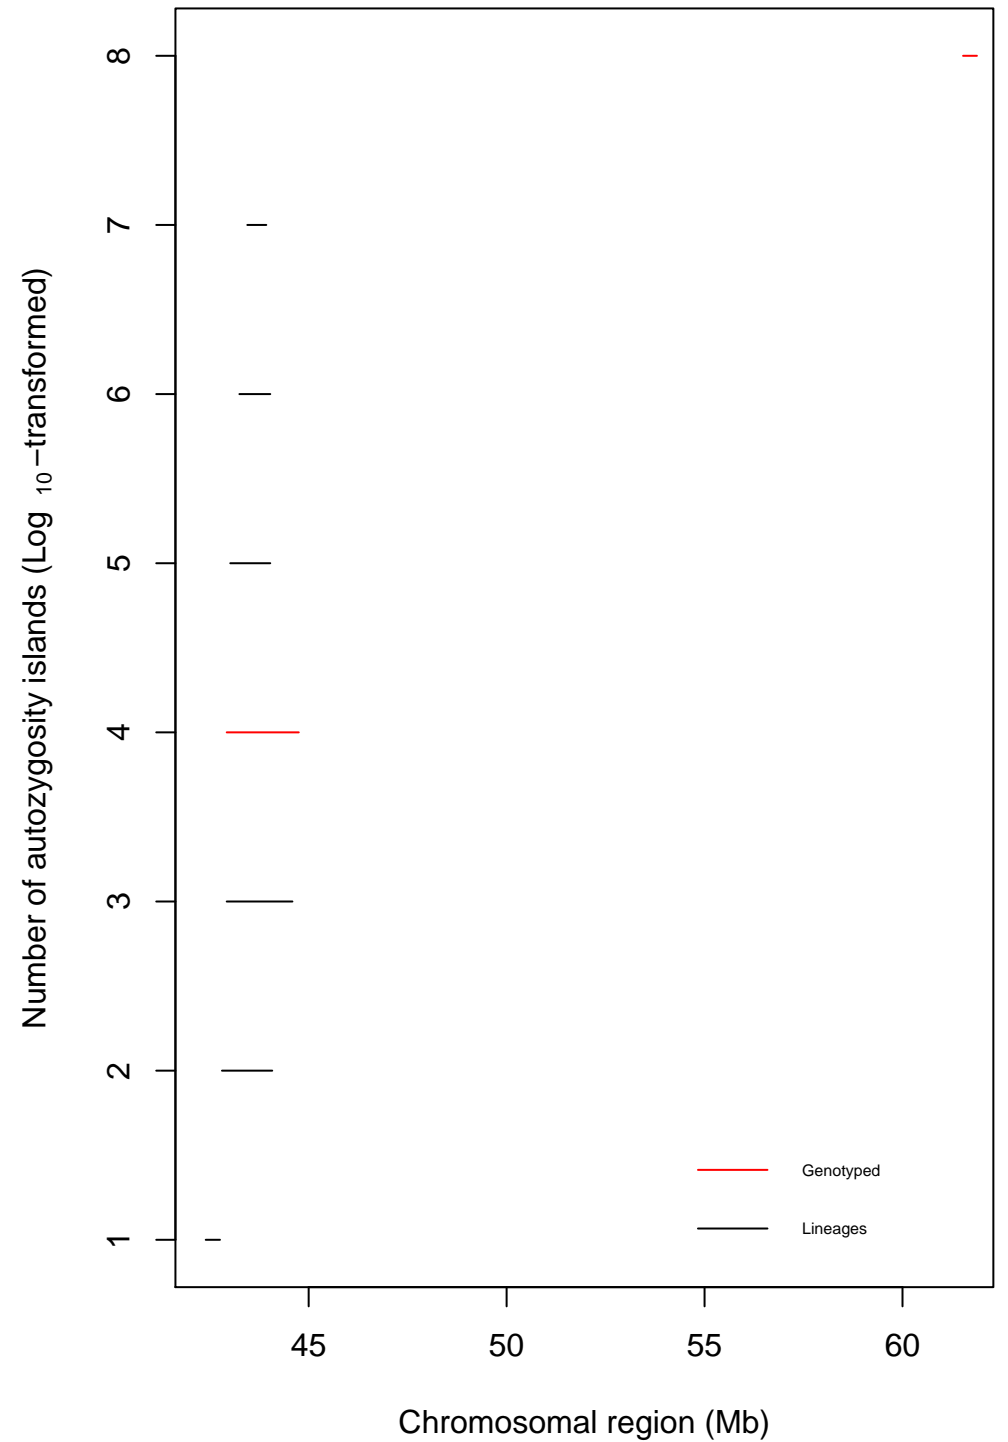

**BTA25**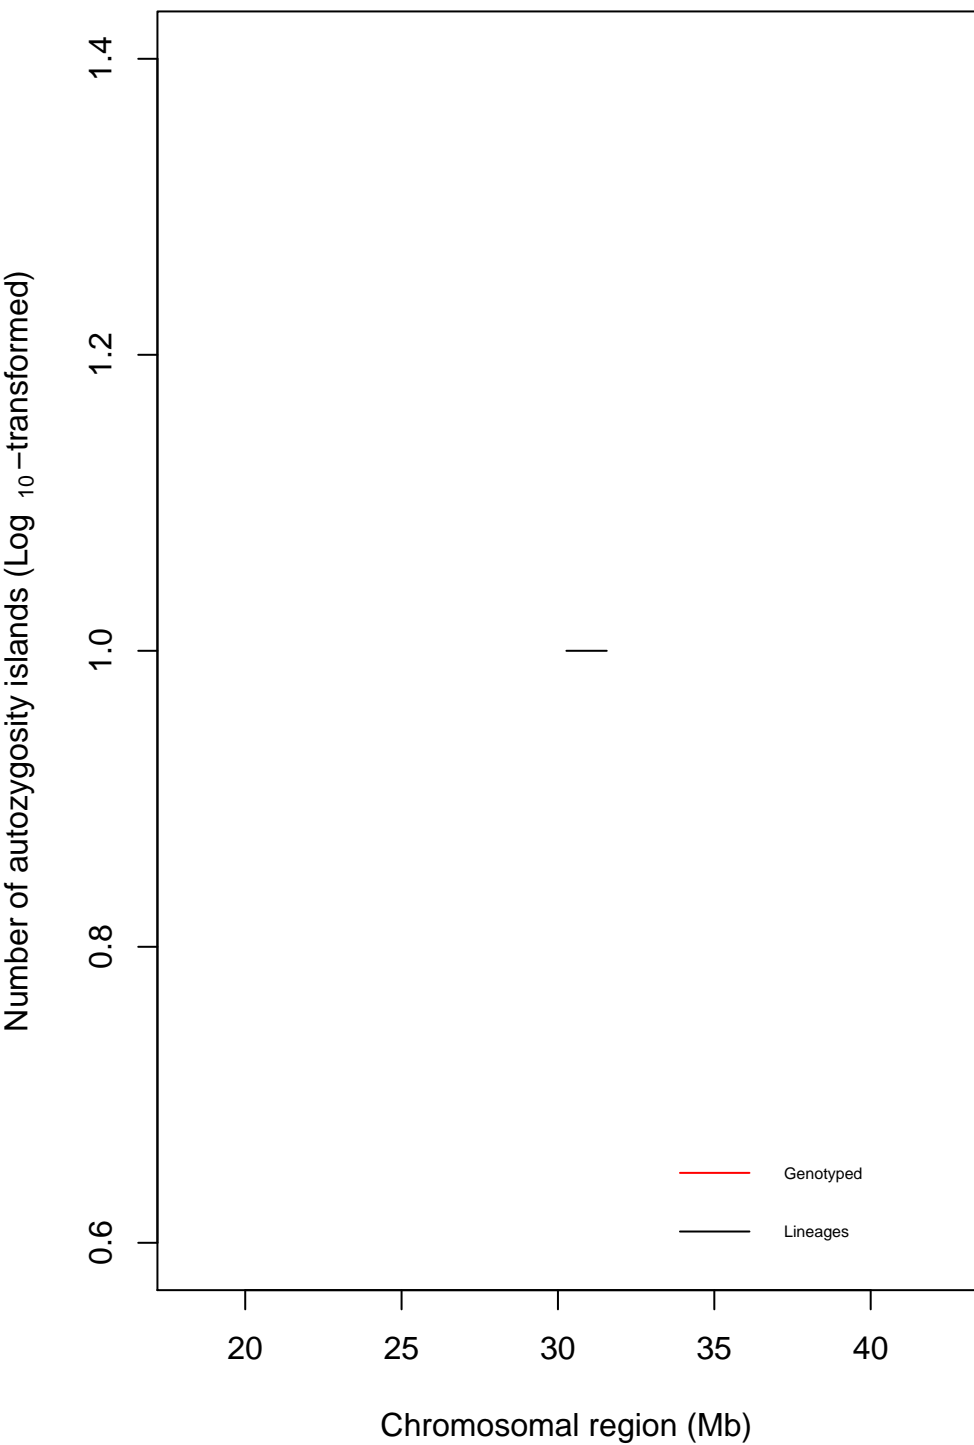**BTA26**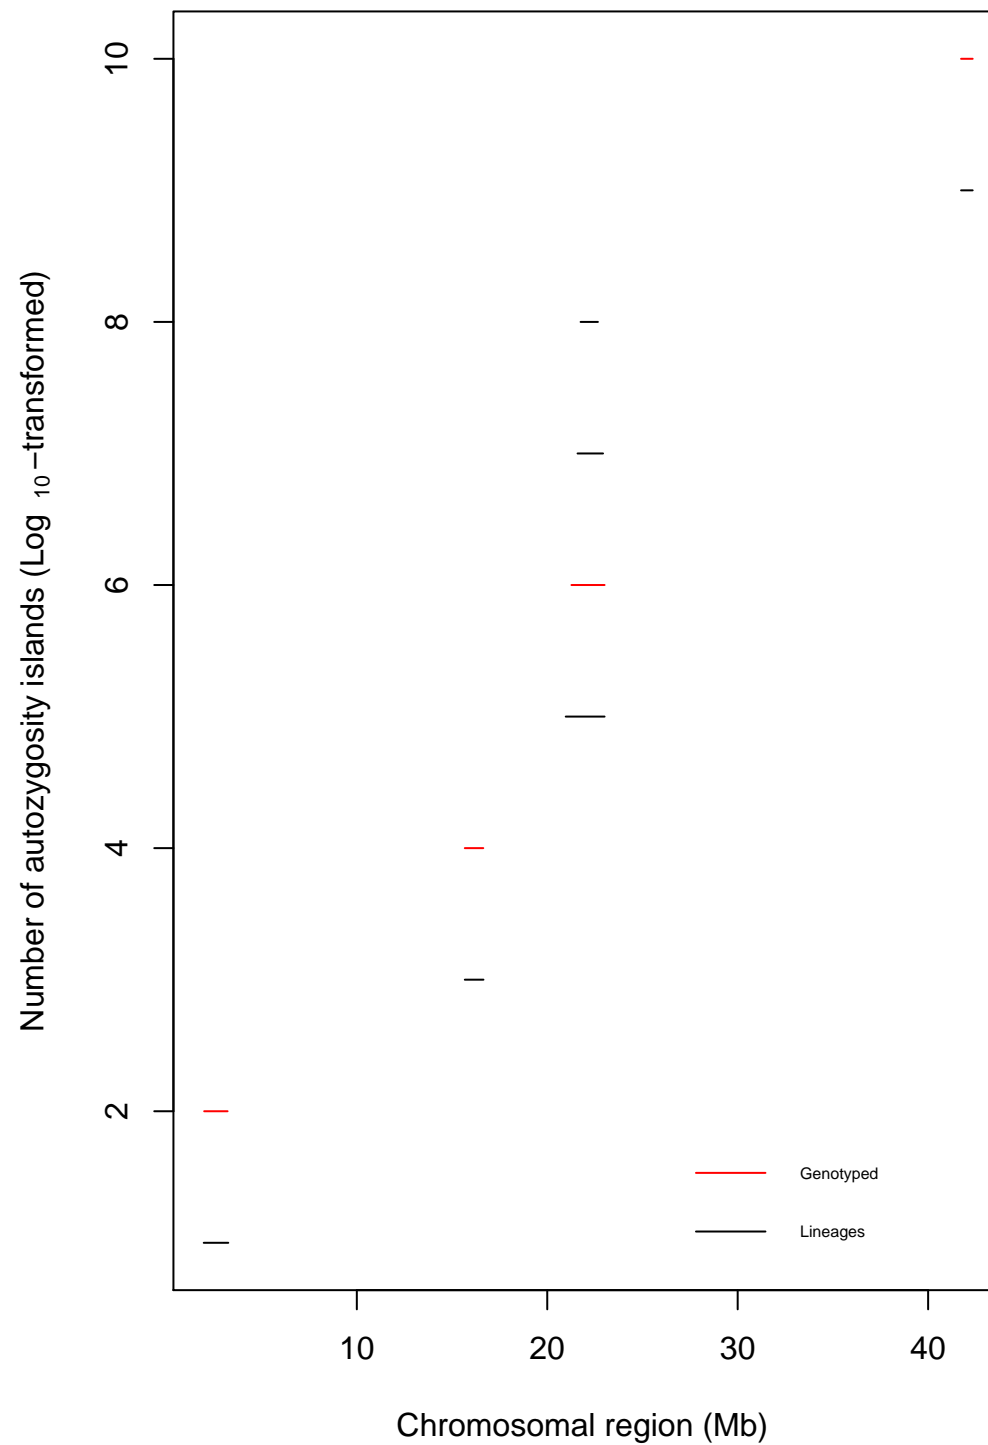

**BTA27**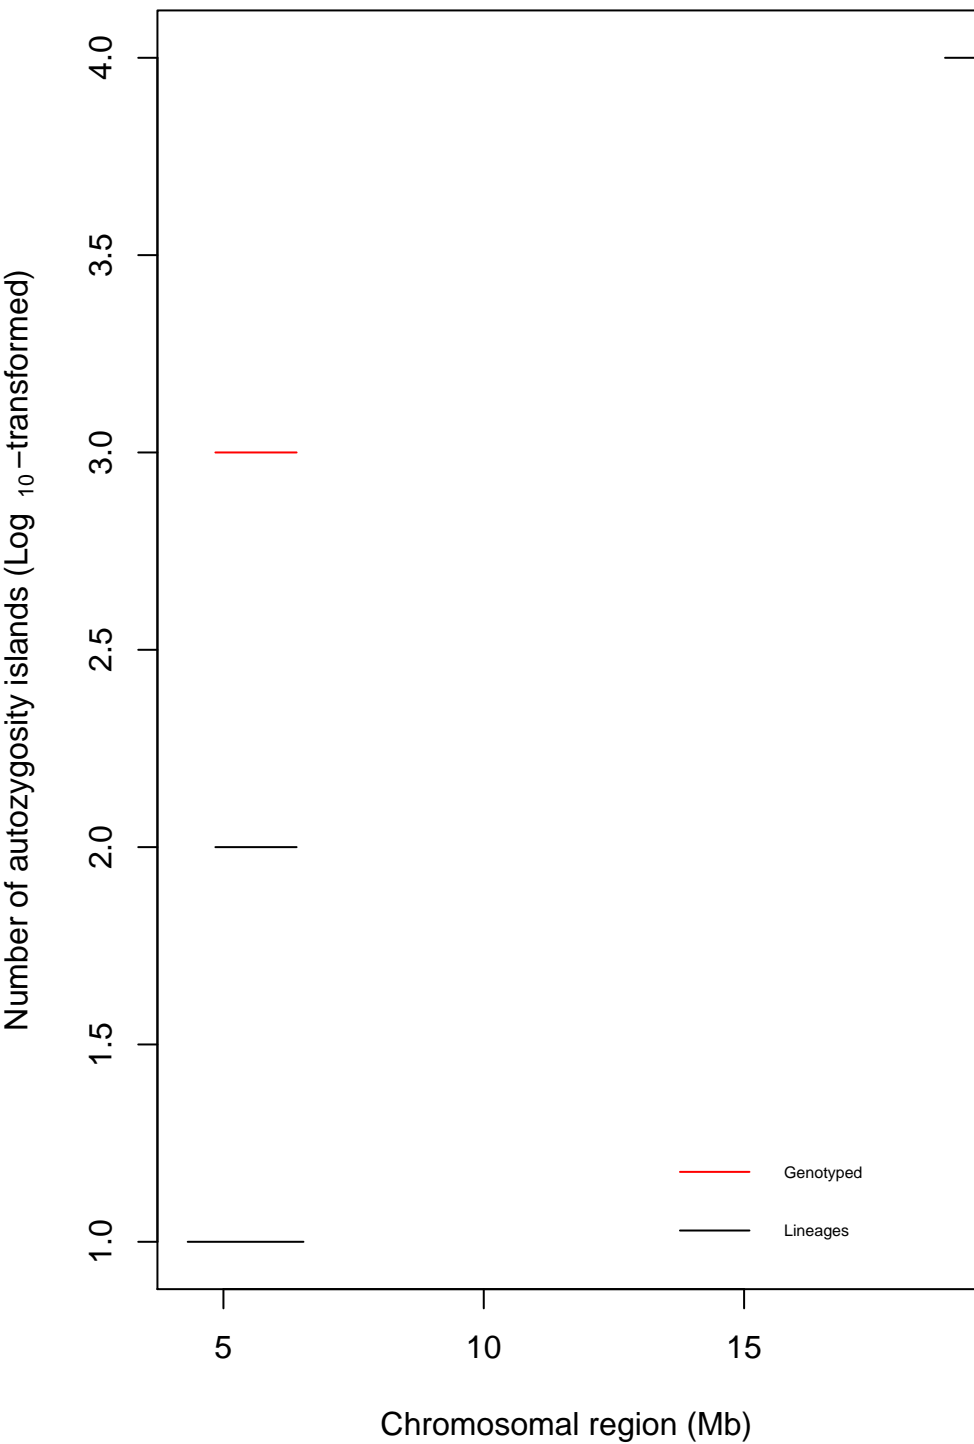**BTA28**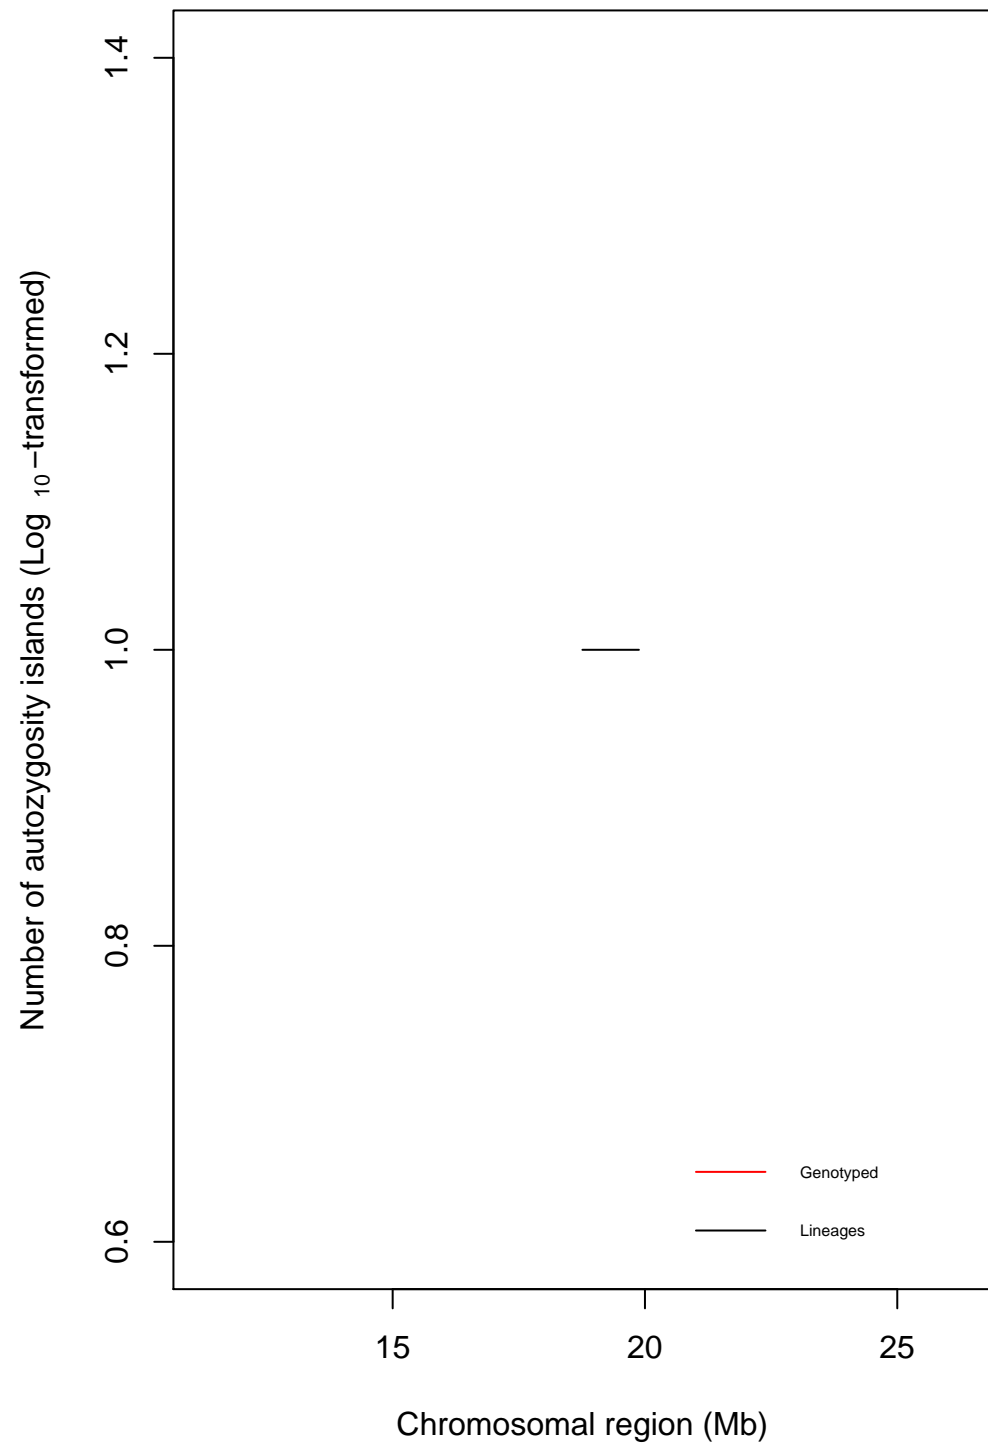

# BTA29

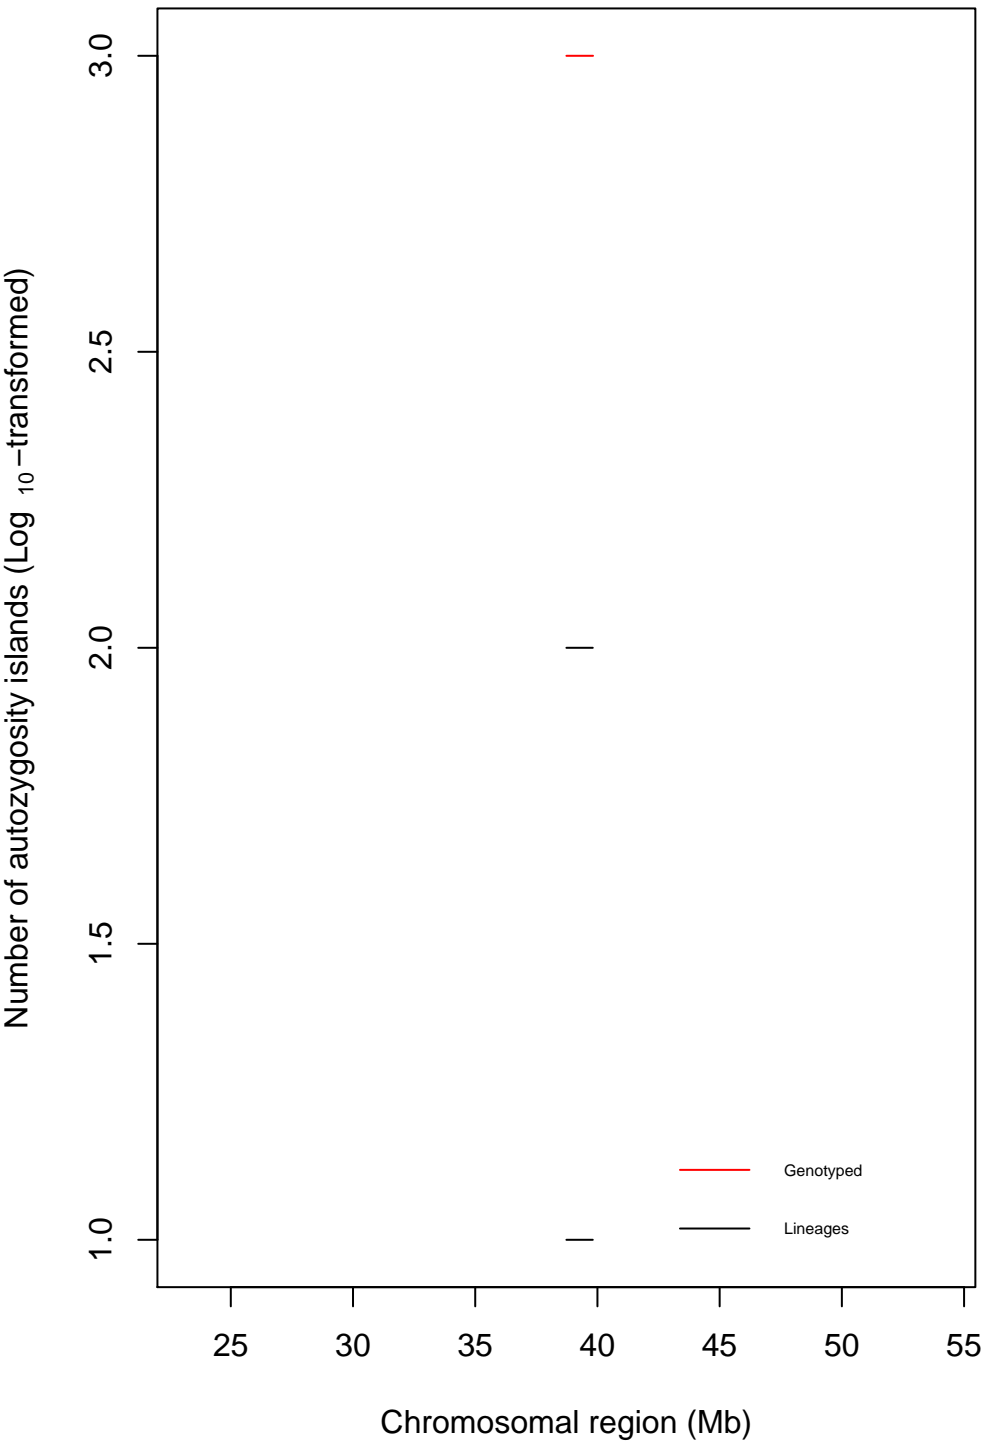

Supplement: 12864_2018_5060_MOESM5_ESM.pdf [file 12864_2018_5060_MOESM5_ESM.pdf]
