# Supplementary material for: Autozygosity islands and ROH patterns in Nellore lineages: evidence of selection for functionally important traits
Source: PubMed Central journal article supplement (PMC6142381; doi:10.1186/s12864-018-5060-8), 2018-09-17

Log<sub>10</sub>-transformed

Number of times a SNP appeared in a ROH

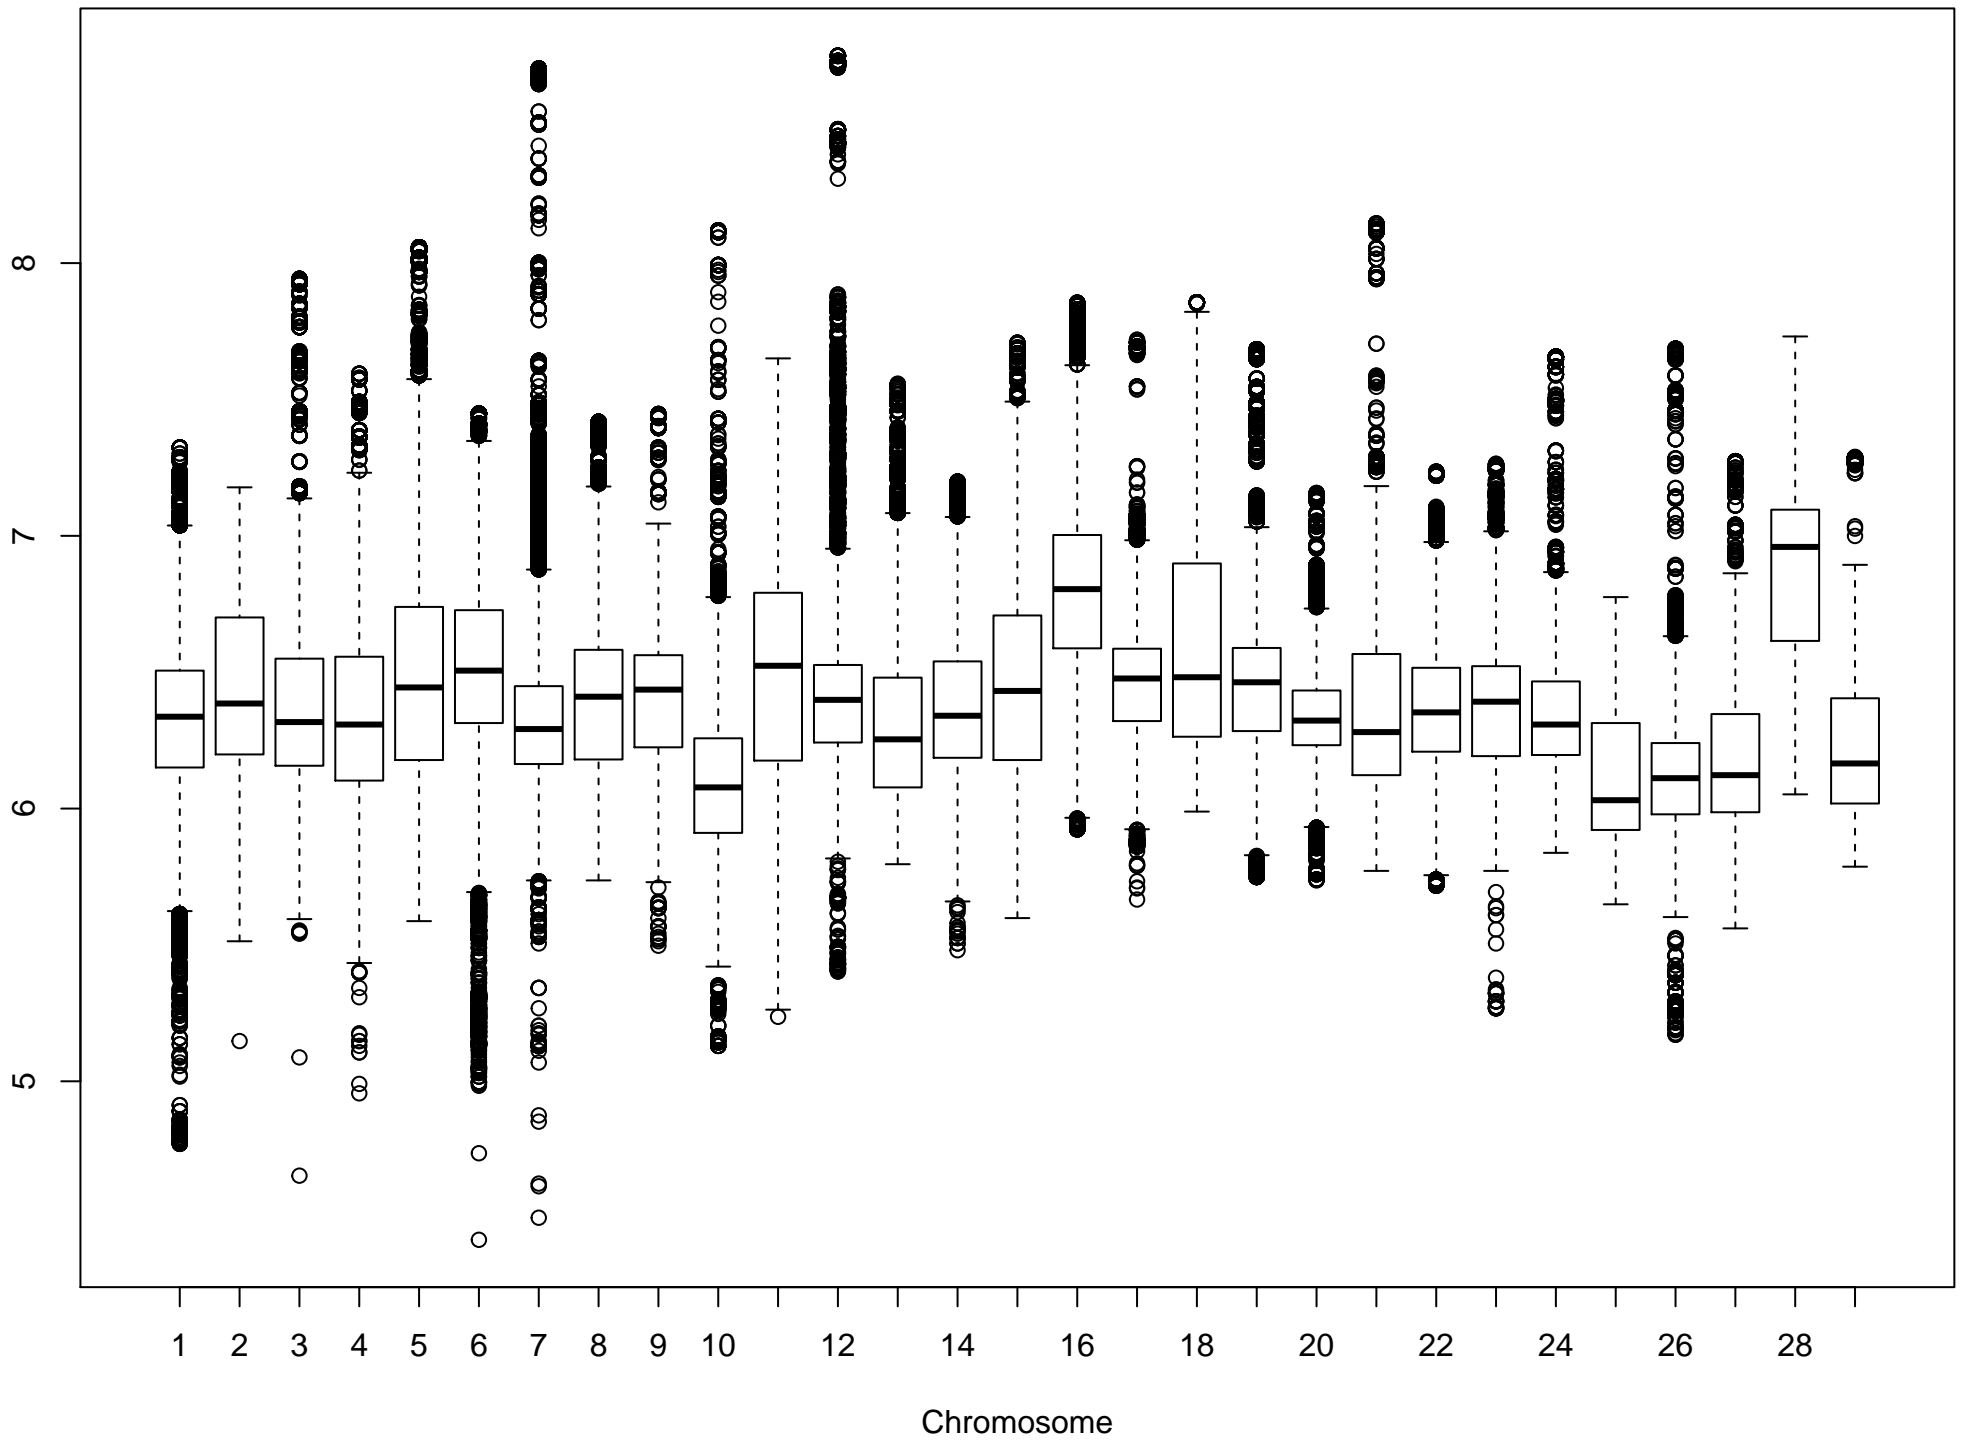

Supplement: 12864_2018_5060_MOESM9_ESM.pdf [file 12864_2018_5060_MOESM9_ESM.pdf]
