# Supplementary material for: Autozygosity islands and ROH patterns in Nellore lineages: evidence of selection for functionally important traits
Source: PubMed Central journal article supplement (PMC6142381; doi:10.1186/s12864-018-5060-8), 2018-09-17

Number of times a SNP appeared in a ROH

Karvadi (Log<sub>10</sub>-transformed)

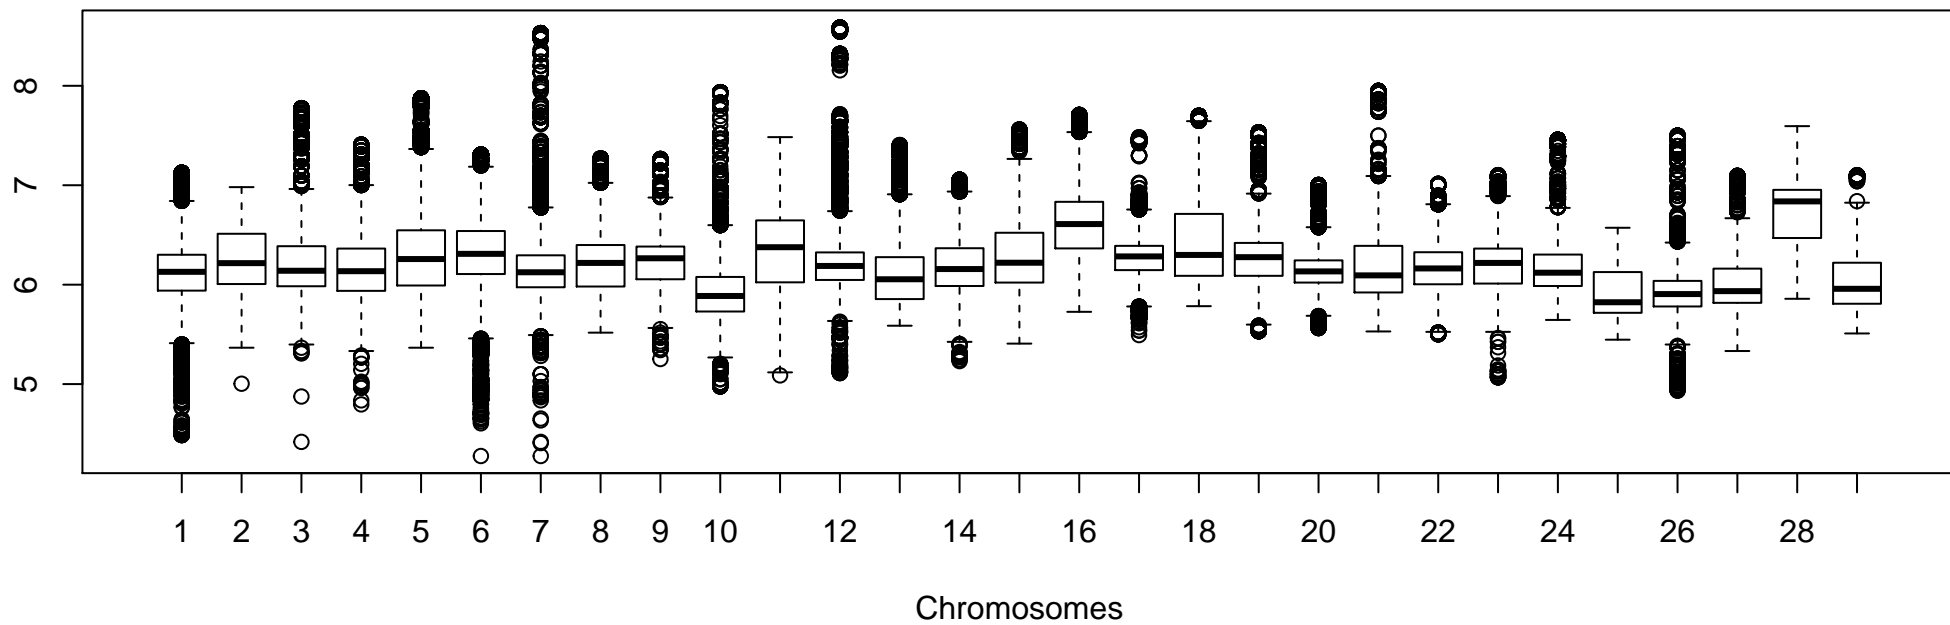

Number of times a SNP appeared in a ROH

Golias (Log<sub>10</sub>-transformed)

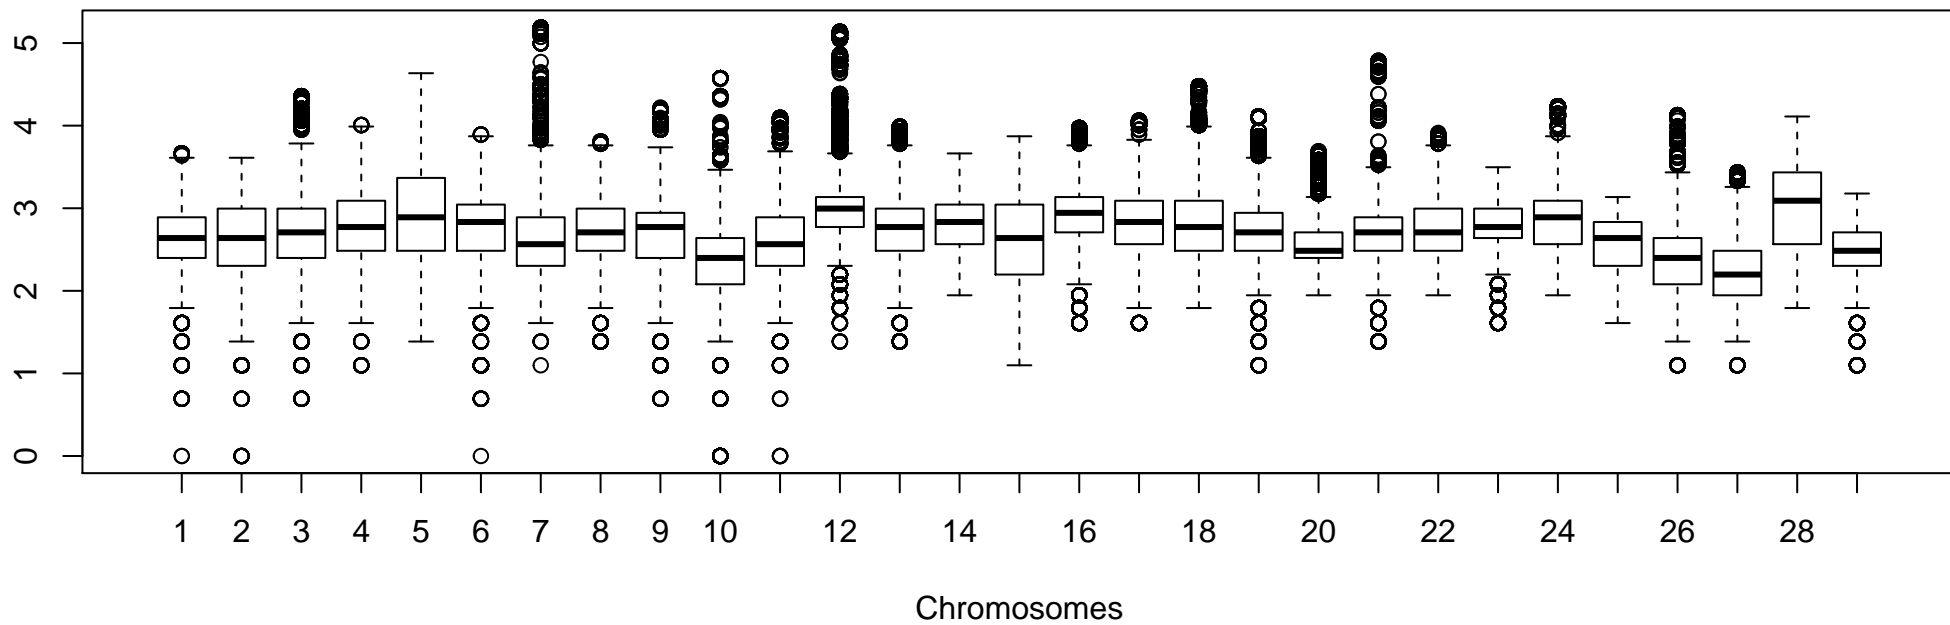

Number of times a SNP appeared in a ROH

Godhavari (Log<sub>10</sub>-transformed)

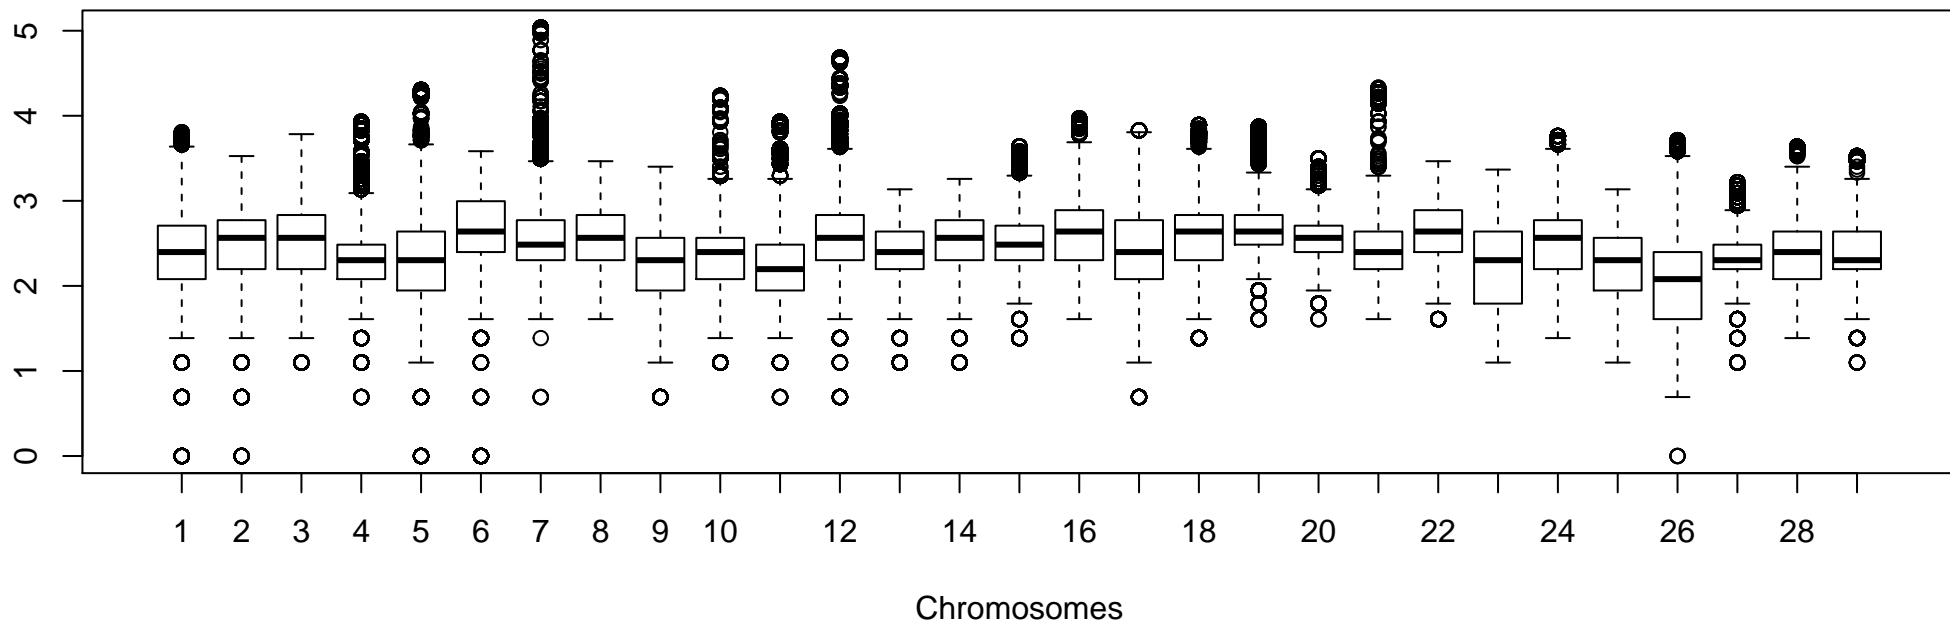

Number of times a SNP appeared in a ROH

Taj Mahal (Log<sub>10</sub>-transformed)

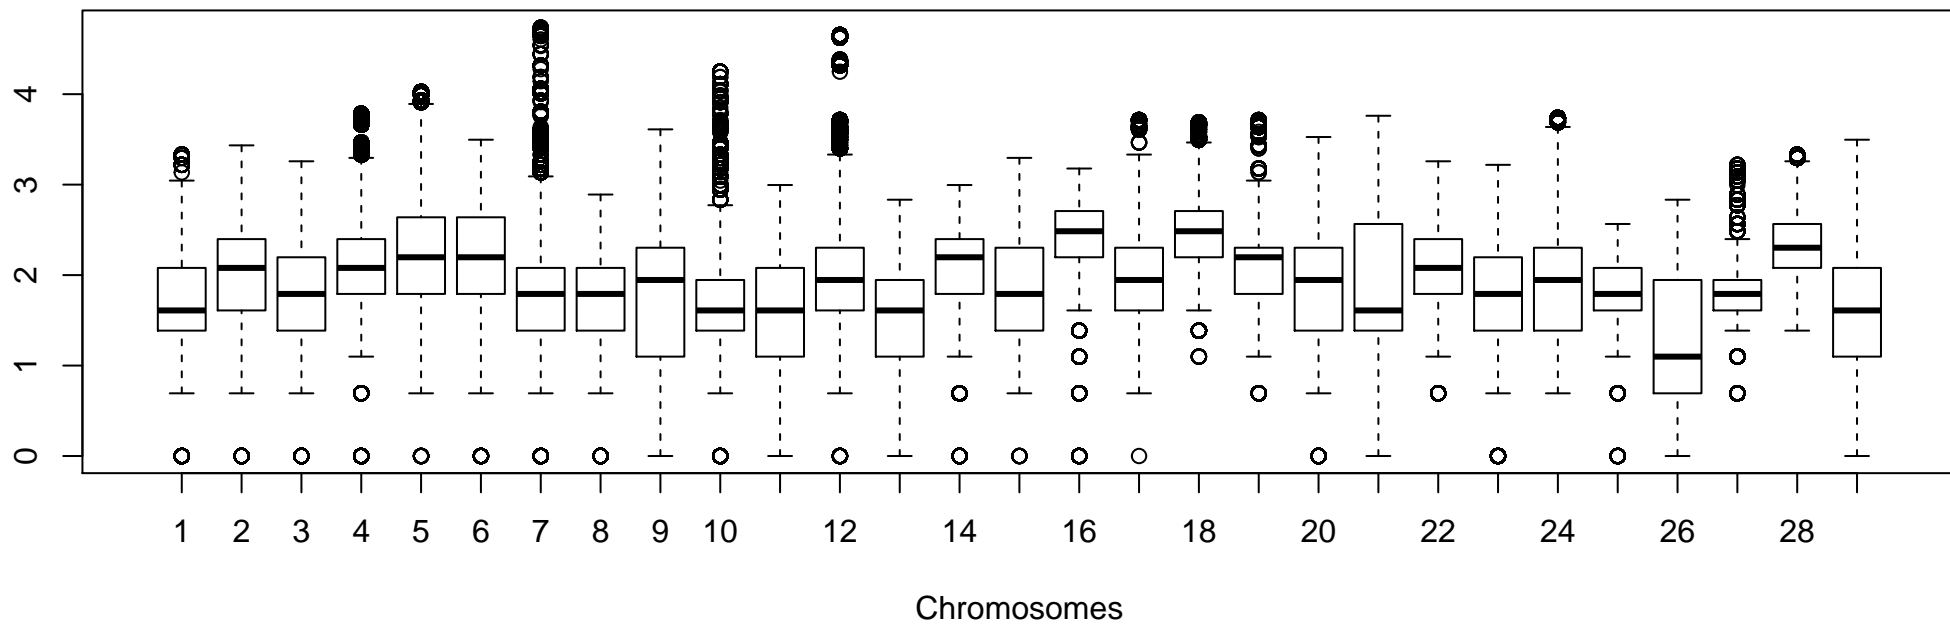

Number of times a SNP appeared in a ROH

Akasamu (Log<sub>10</sub>-transformed)

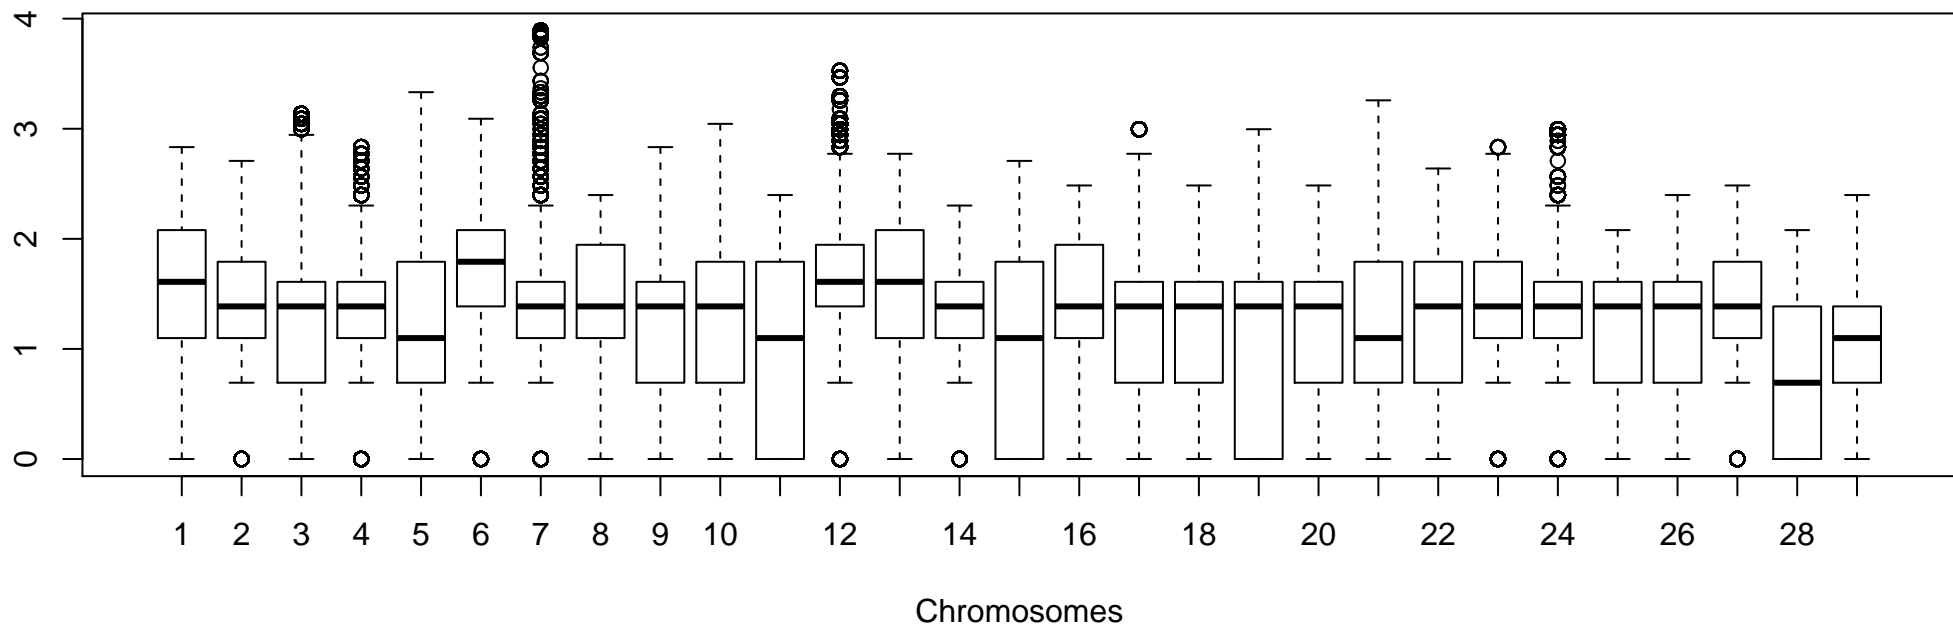

Number of times a SNP appeared in a ROH

Nagpur (Log<sub>10</sub>-transformed)

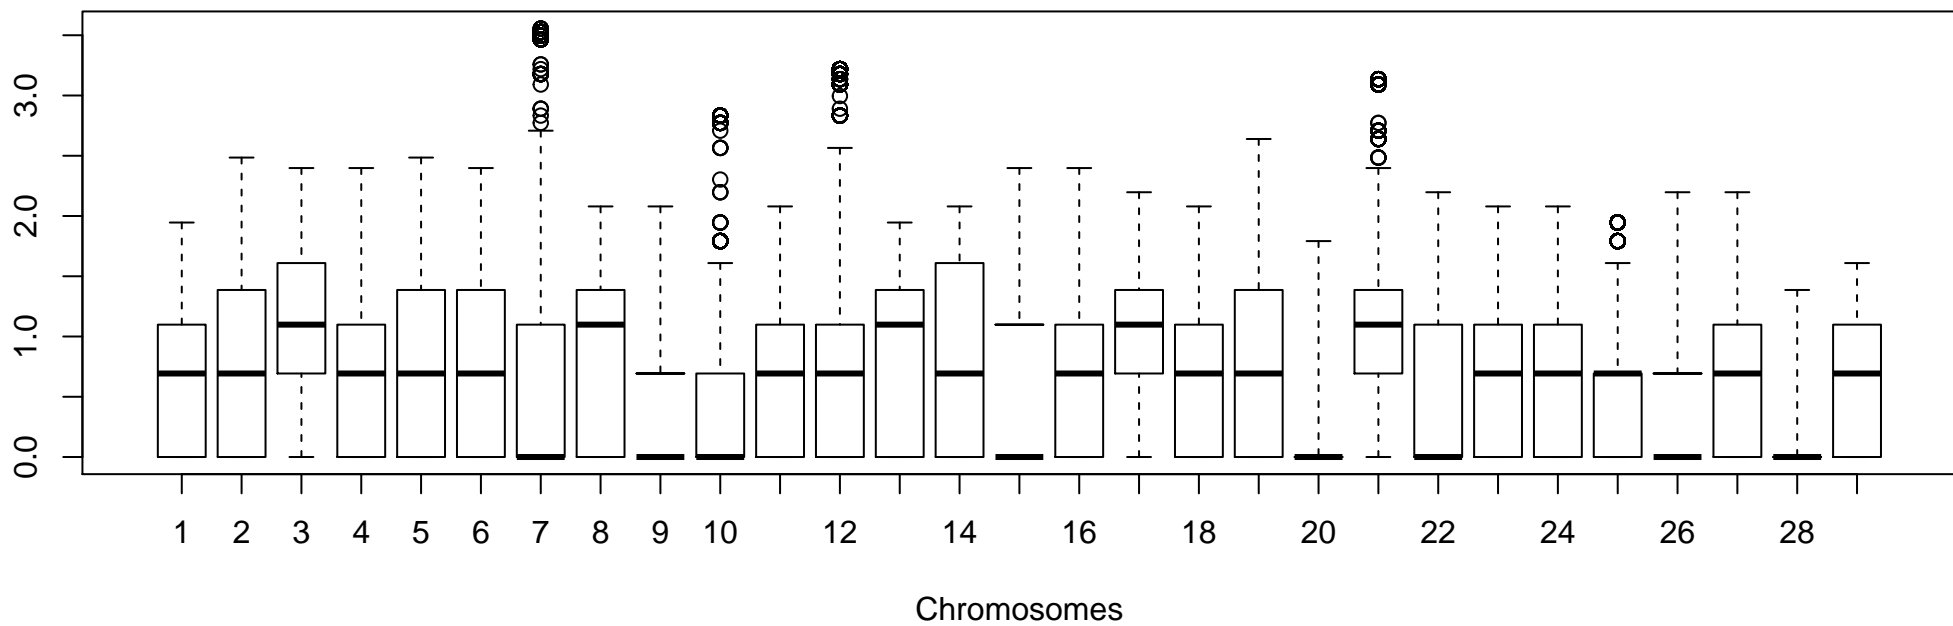

Supplement: 12864_2018_5060_MOESM10_ESM.pdf [file 12864_2018_5060_MOESM10_ESM.pdf]
